# Supplementary material for: State of the California Current Ecosystem report in 2022: a tale of two La Niñas
Source: Frontiers journal article supplement (doi:10.3389/fmars.2024.1294011), 2024-02-09

Supplementary Material for State of the California Current Ecosystem in 2022: A Tale of Two La Niñas

The State of the California Current Report (SOCCR) has been reporting physical and biological conditions throughout the California Current Ecosystem (CCE) since 1993. Until 2020 (Weber et al. 2021), the SOCCR was published in the now defunct journal “CalCOFI Reports” and was essentially a collection of vignettes describing various components of the CCE as written by a given contributer. In 2020, when the SOCCR transitioned to Frontiers in Marine Science, we began to reformat the report into a more streamlined fashion (Weber et al. 2021). The 2021 SOCCR (renamed State of California Current Ecosystem Report (SOCCER)) further continued the streamlining process and attempted to report data that was common among sampling regions (Thompson et al. 2022). As such, we cut from the main manuscript data that did not integrate smoothly with the main text.

However, this additional data is still important for providing a fuller understanding of CCE conditions in 2022, and we present in this Supplemental Appendix additional data streams and vignettes that are not in the main paper. Here, we follow the same flow of presentation by first providing additional data at large scales and then regional results from north to south.

Weber, E.D., Auth, T.D., Baumann-Pickering, S., Baumgartner, T.R., Bjorkstedt, E.P., Bograd, S.J., Burke, B.J., Cadena-Ramírez, J.L., Daly, E.A., De La Cruz, M., Dewar, H., Field, J.C., Fisher, J.L., Giddings, A., Goericke, R., Gomez-Ocampo, E., Gomez-Valdes, J., Hazen, E.L., Hildebrand, J., Horton, C.A., Jacobson, K.C., Jacox, M.G., Jahncke, J., Kahru, M., Kudela, R.M., Lavaniegos, B.E., Leising, A., Melin, S.R., Miranda-Bojorquez, L.E., Morgan, C.A., Nickels, C.F., Orben, R.A., Porquez, J.M., Portner, E.J., Robertson, R.R., Rudnick, D.L., Sakuma, K.M., Santora, J.A., Schroeder, I.D., Snodgrass, O.E., Sydeman, W.J., Thompson, A.R., Thompson, S.A., Trickey, J.S., Villegas-Mendoza, J., Warzybok, P., Watson, W., and Zeman, S.M. (2021). State of the California Current 2019–2020: Back to the Future With Marine Heatwaves? Frontiers in Marine Science 8.

Thompson, A. R., E. P. Bjorkstedt, Steven J. Bograd, J. L. Fisher, E. L. Hazen, A. Leising, J. A. Santora, E. V. Satterthwaite, W. J. Sydeman, M. Alksne, T. D. Auth, S. Baumann-Pickering, N. M. Bowlin, Brian J. Burke, E. A. Daly, H. Dewar, John C. Field, N. T. Garfield, A. Giddings, R. Goericke, J. Hildebrand, C. A. Horton, Kym C. Jacobson, M. G. Jacox, J. Jahncke, M. Johns, J. Jones, R. M. Kudela, Sharon R. Melin, C. A. Morgan, C. F. Nickels, R. A. Orben, J. M. Porquez, E. J. Portner, A. Preti, R. R. Robertson, D. L. Rudnick, K. M. Sakuma, I. D. Schroeder, O. E. Snodgrass, S. A. Thompson, J. S. Trickey, P. Warzybok, W. Watson, and E. D. Weber. (2022). State of the California Current Ecosystem in 2021: Winter is coming? Frontiers in Marine Science 9.

1. **Basin Scale**

We presented in the main manuscript the Biologically Effective Upwelling Transport Index (BEUTI). Here, we show the accompanying Cumulative Upwelling Transport Index (CUTI) together with sea surface temperature anomaly. The patterns in 2022 are similar to BEUTI: upwelling was above average in January coastwide, dropped to below average in the north by spring and then to below average or average in summer and fall (Figure S1A).

The North Pacific High (NPH) serves as an index of productivity in the CCE (Schroeder et al. 2013). High values of the NPH are indicative of turbulent ocean conditions that elevates nutrients towards the surface, fuels primary productivity, providing food for zooplankton such as krill and copepods (Feinberg and Peterson 2003). By contrast, low values of the NPH are associated with a calm, stratified ocean and low primary production. The North Pacific High area during Jan-Feb was large during 2022 but not as large as 2021; the area usually is large during a La Niña (Figure S1B)

Feinberg, L.R., and Peterson, W.T. (2003). Variability in duration and intensity of euphausiid spawning off central Oregon, 1996–2001. Progress in Oceanography 57, 363-379.

Schroeder, I.D., Black, B.A., Sydeman, W.J., Bograd, S.J., Hazen, E.L., Santora, J.A., and Wells, B.K. (2013). The North Pacific High and wintertime pre-conditioning of California current productivity. Geophysical Research Letters 40, 541-546.

Figure S1A. Sea surface temperature anomaly through time and latitude from shore to 75 km from shore and Cumulative Upwelling Transport Index over the same location and period.


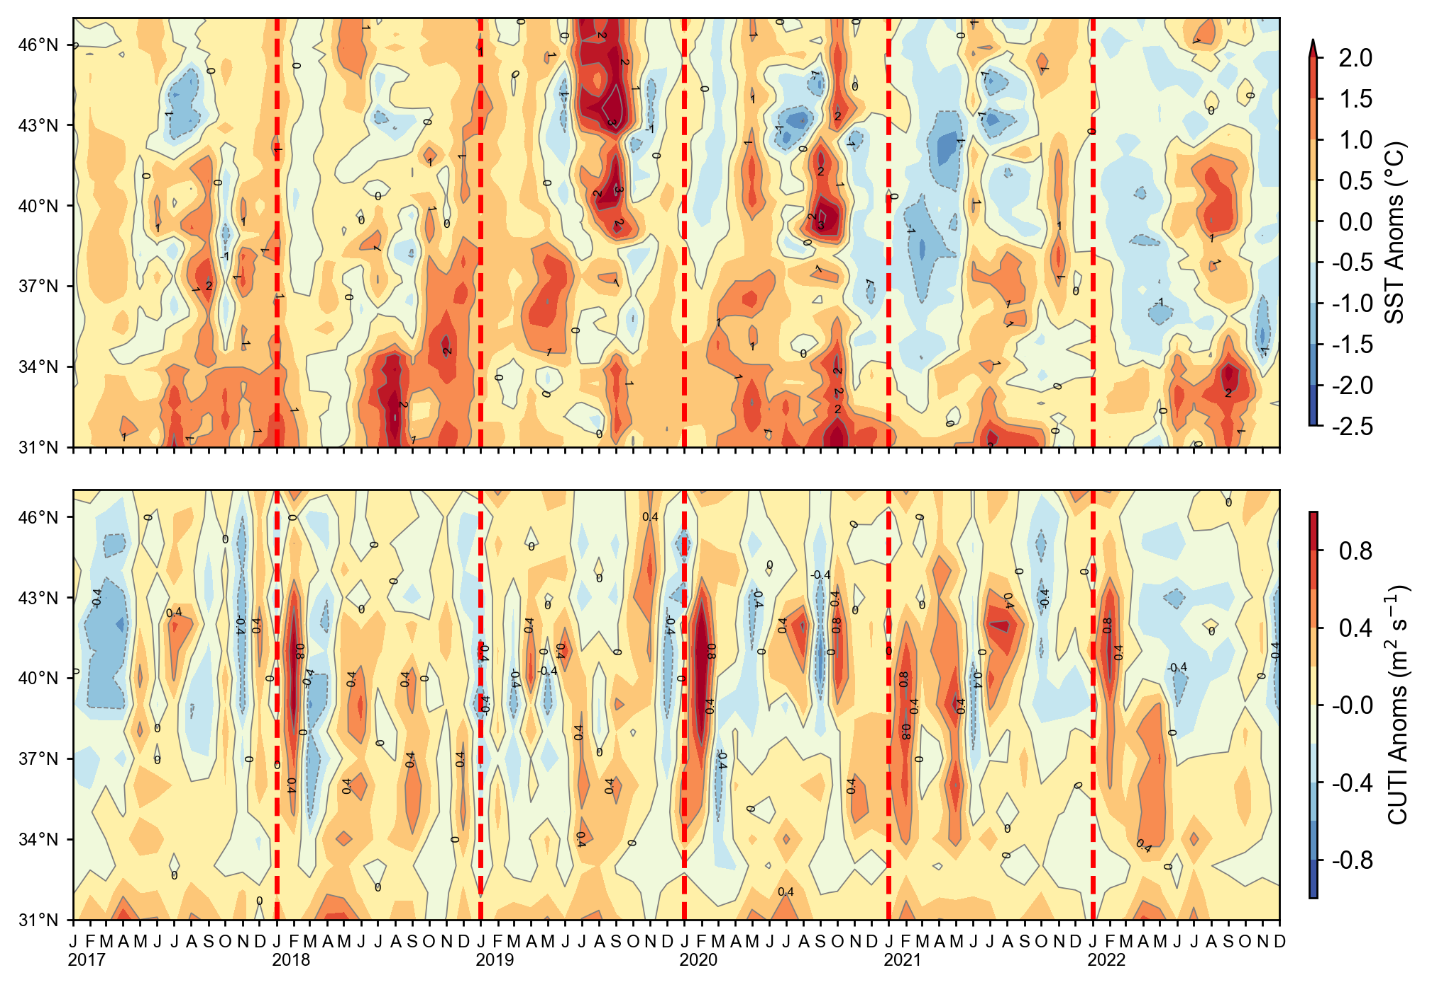


Figure S1B. Area encompassed by the North Pacific High in January and February.


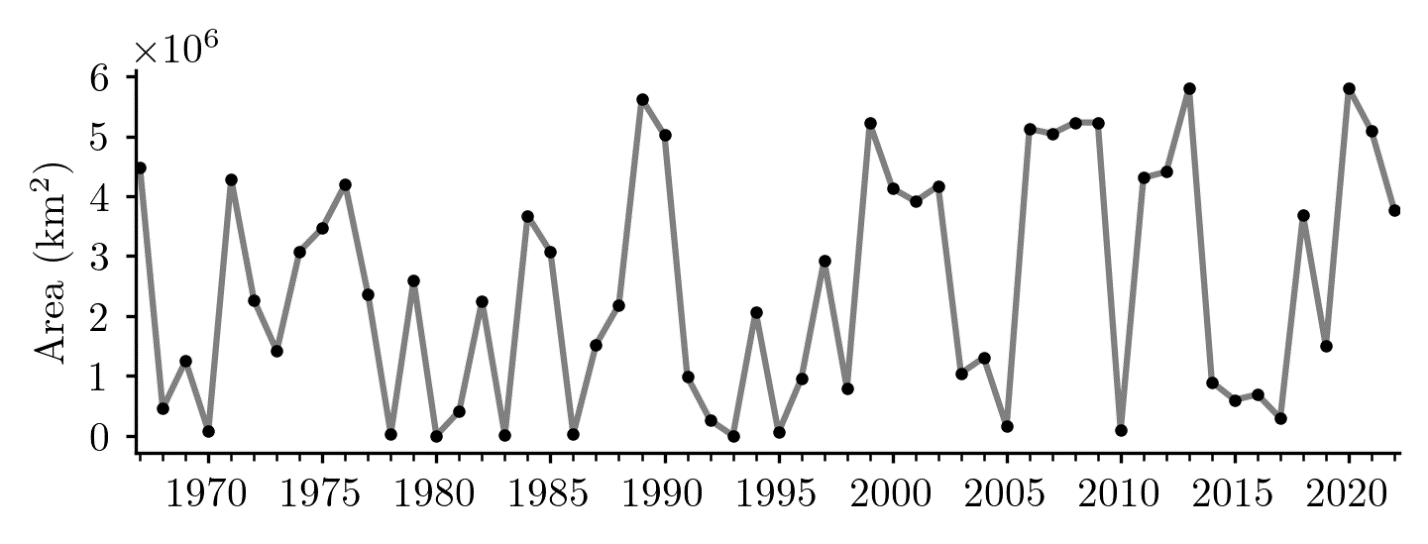


**2. Baja California, Mexico**

The California Current Ecosystem extends into Baja California as the flow of the California Current continues south of the U.S./Mexico border before veering west and becoming the North Equatorial Current in southern Baja California Sur. The CalCOFI program sampled off Mexico from its inception until 1983. The former CalCOFI stations off Mexico were reoccupied by Investigaciones Mexicanas de la Corriente de California (IMECOCAL) in 1997.

Unfortunately, the IMECOCAL oceanographic vessel R/V Alpha Helix was not available to sample IMECOCAL stations in 2022 so we have resorted to satellite remote sensing to present the spring conditions over the IMECOCAL region. We have also extended the domain to include southern region of the CalCOFI sampling grid from line 80 off Point Conception (34° N latitude) down to the southernmost IMECOCAL line 137 that ends offshore just north of 24° N.

We present mean values of Geostrophic Currents (ADT), Sea Surface Temperature (SST), Chlorophyll a, (Chl a), and Sea Surface Salinity for April 2022. We do not include the anomalies for the sake of brevity. SST was obtained from the site at https://podaac.jpl.nasa.gov/Multiscale_Ultra-high_Resolution_MUR-SST; Salinity was obtained from https://podaac.jpl.nasa.gov/dataset/SMAP_JPL_L3_SSS_CAP_MONTHLY_V42; Geostrophic Currents (based on Absolute Dynamic Topography was obtained from https://www.aviso.altimetry.fr/en/data/products/sea-surface-height-products/global/gridded-sea-level-anomalies-mean-and-climatology.html.

The figures are ordered as: 1) Geostrophic Currents derived from Absolute Dynamic Topography; Geostrophic currents varied from near 0 up to 40 cm s-1, 2) Sea Surface Temperature (SST) varied from 12° C in the north to 25° in the southern region. 3) Chlorophyll a (Chl a) varied from approximately 6 to 15 mg m-3 4) Sea Surface Salinity (SSS) varied from approximately 33.5 to 35.4 psu.

Figure S2a presents the geostrophic currents from Point Conception at 34° N to 22°N below the Baja California peninsula. The principal flow begins offshore from Point Conception and follows a meandering path inshore to roughly 31° N in the region of Ensenada, Baja California and thus is labelled the Ensenada Front. This continues as a nearshore costal current down the Baja peninsula.

Figure S2b presents the mean Sea Surface Temperature (SST). The SST indicates three costal upwelling plumes that are notably colder (13-14°C) than the offshore temperatures. These extend from Ensenada (line 100) to Vizcaino Bay enclosed by Punta Eugenia (line 120). Below Punta Eugenia at 28° N there is an abrupt warming to roughly 19-20 °C offshore, onshore was 16-18°C, while below the Baja peninsula it was 24°C.

Figure S2c presents the mean Chlorophyll a (Chl a). This image shows the coastal band of pigment from Point Conception to the end of the Baja peninsula. Chlorophyll is most concentrated off Point Conception. Off northern Baja California there are three plumes of pigment that appear to be associated with the upwelling plumes on Figure S2b. South of Punta Eugenia the pigment closer to shore and less concentrated.

Figure S2d presents the mean Sea Surface Salinity (SSS). This image indicates very low salinity offshore of Point Conception to roughly 25°N (approximately 33.5 psu). Alongshore from Point Conception to northern Baja California there are near costal patches of slightly lower salinity (approximately 33 psu) to approximately30° N. South of Punta Eugenia at 28° N the costal salinity begins to increase to 34 psu, but near 23° N a band of 34.3 occurs. Just south of the peninsula of Punta Baja the salinity increased to 34.5 with a band of 34.7 psu spreading westward at 21.5° N.

Figure S2a. Geostrophic currents in April 2022.


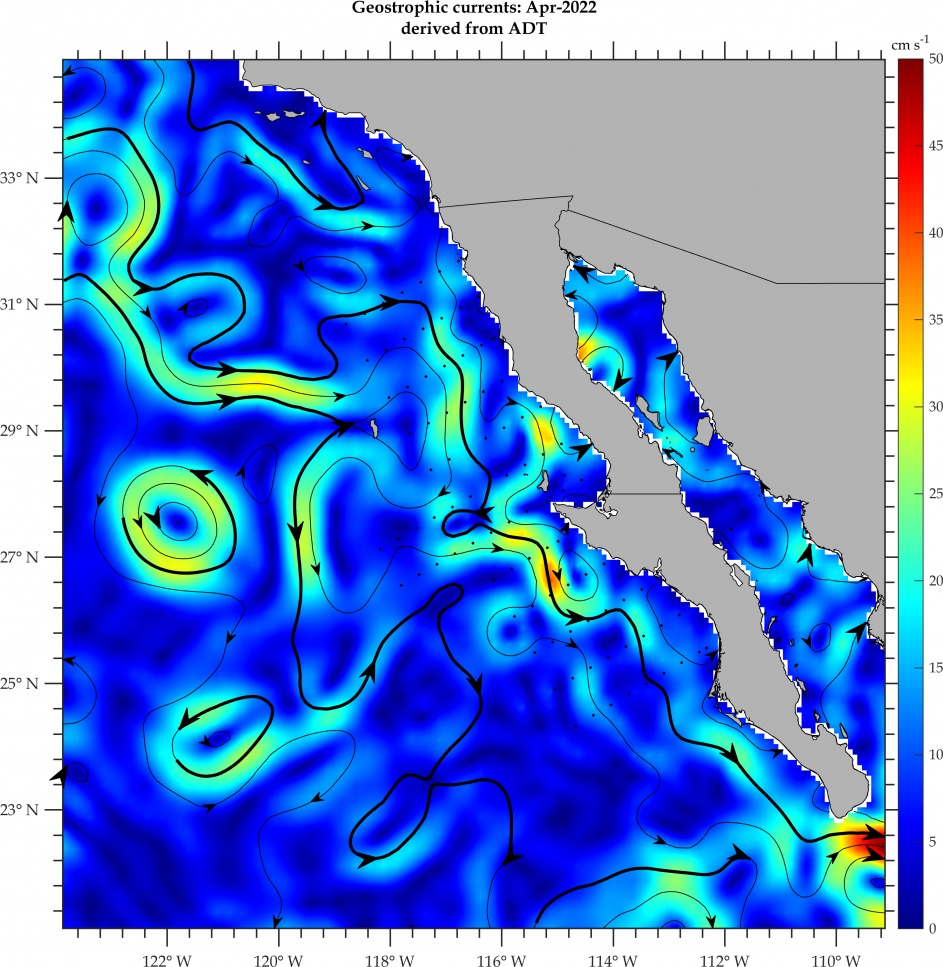


Figure S2b. Mean sea surface temperature for April 2022.


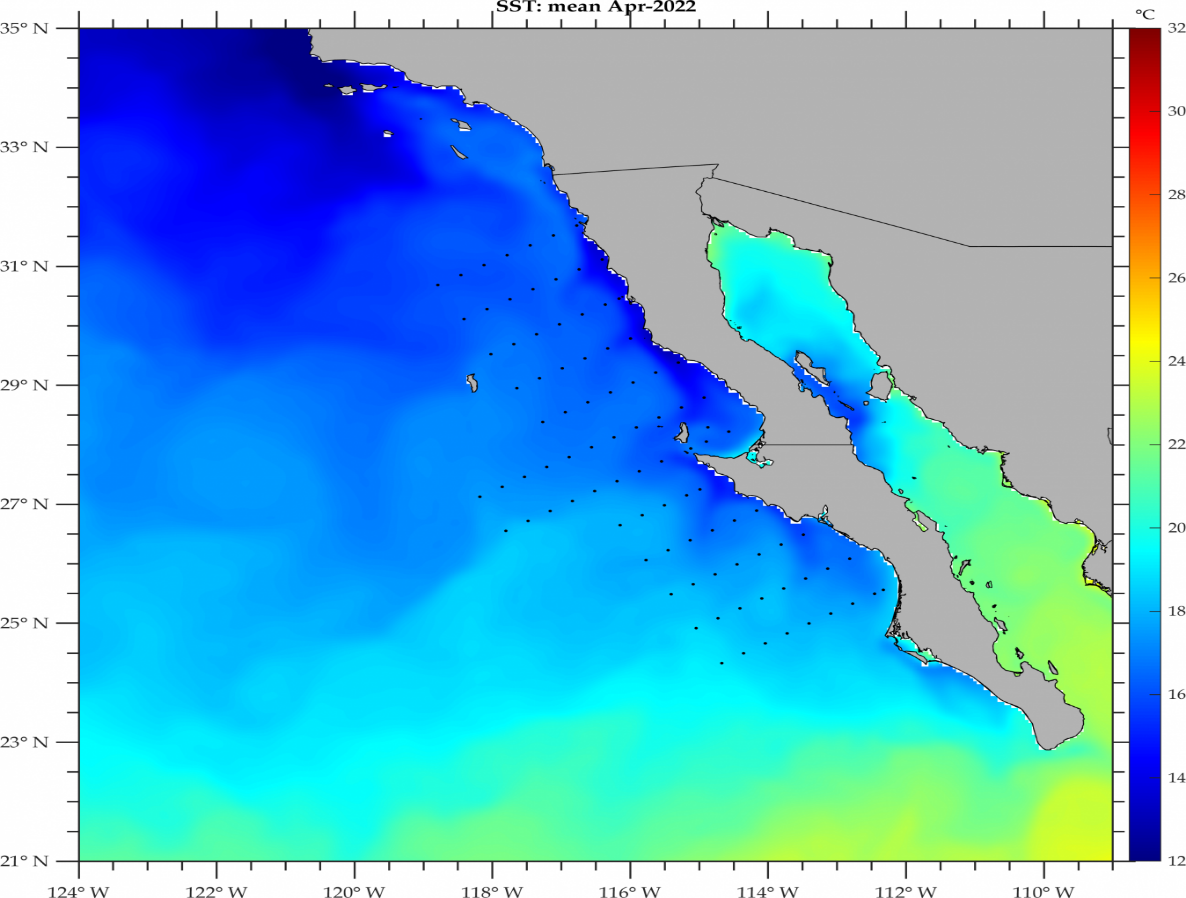


Figure S2c. Mean chlorophyll *a* in April 2022.


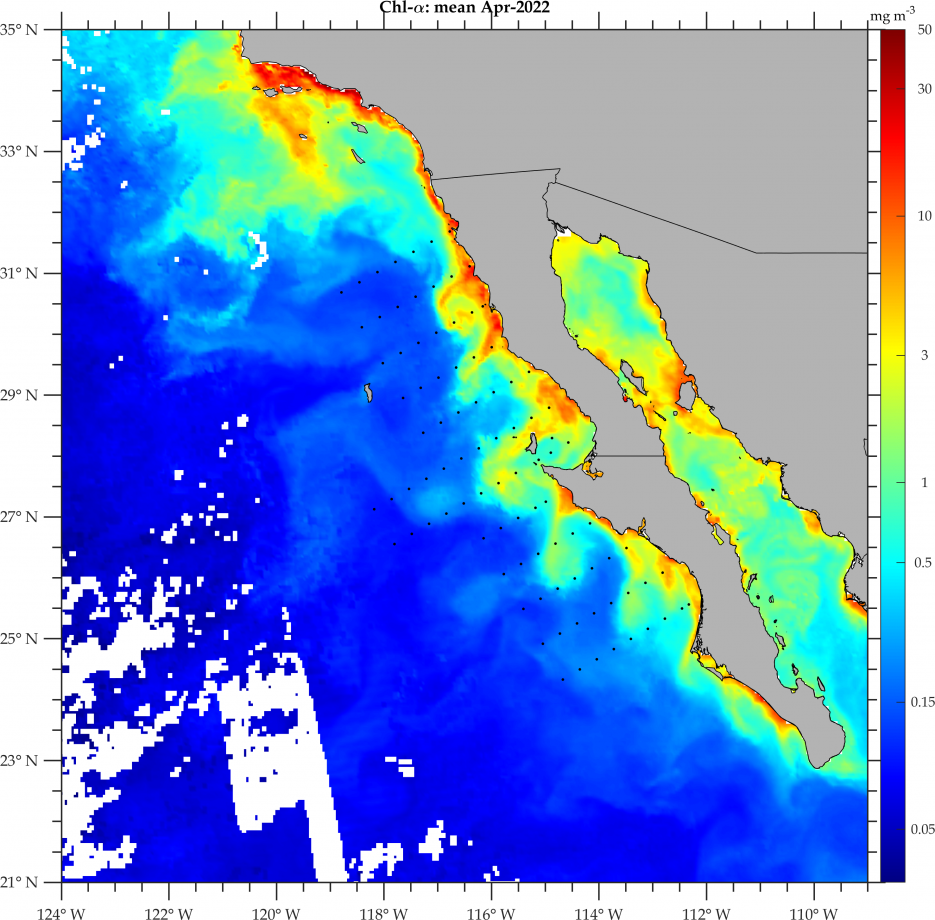


Figure S2d. Mean sea surface salinity in April 2022.


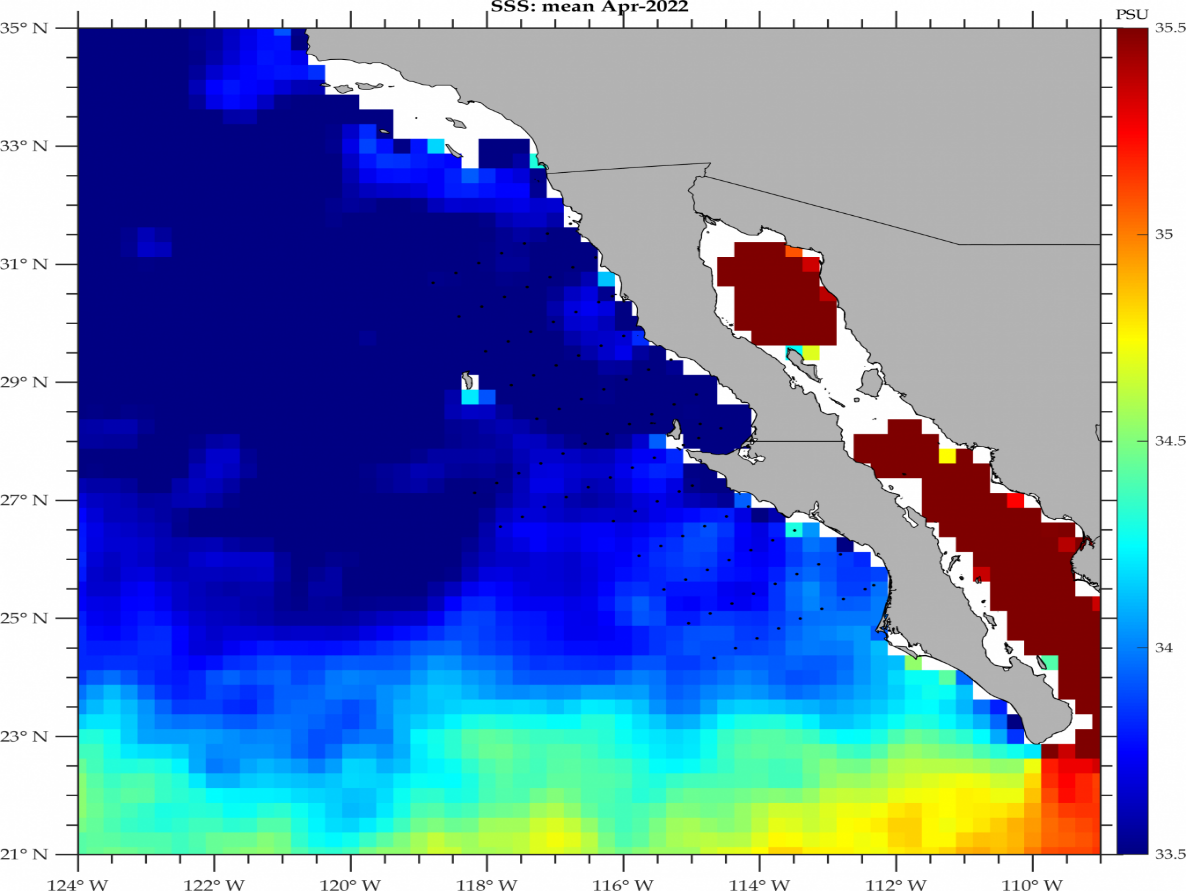


1. **2022 Harmful Algal Blooms**

Harmful algal blooms have been monitored shore side since 2008. Here we present 2022 anomalies of *Pseudo-nitzschia seriata* cell counts per month from Monterey Wharf, California Polytechnic San Luis Obispo Pier in Avila, Stearns Wharf in Santa Barbara, Santa Monica Pier and Newport Beach Pier. In general, cell counts were low during most of the year although slightly elevated counts were found in January and/or February.

Monterey Wharf

Cal Poly San Luis Obispo Pier Avila

Stearns Wharf Santa Barbara

Santa Monica Pier

Newport Beach Pier

**4. California Underwater Glider Network**

A remarkable feature in this year’s data is that temperature anomalies at about 50 m and deeper have gotten back to near zero (where the anomaly is relative to the annual cycle during 2007-2013) while temperature anomalies near the surface have remained high (FigureS 4A). We found that temperature anomaly at 50 m is strongly related to conditions at the equator, so with the La Niña those temperatures have indeed gone down. However, temperatures at the surface are still high, indicating that stratification has gone up. Following are several figures intended to show these effects: (1) near normal temperature anomalies at 50 m, (2) positive temperature anomalies at 10 m, (3) increased temperature stratification.

Figure S4A


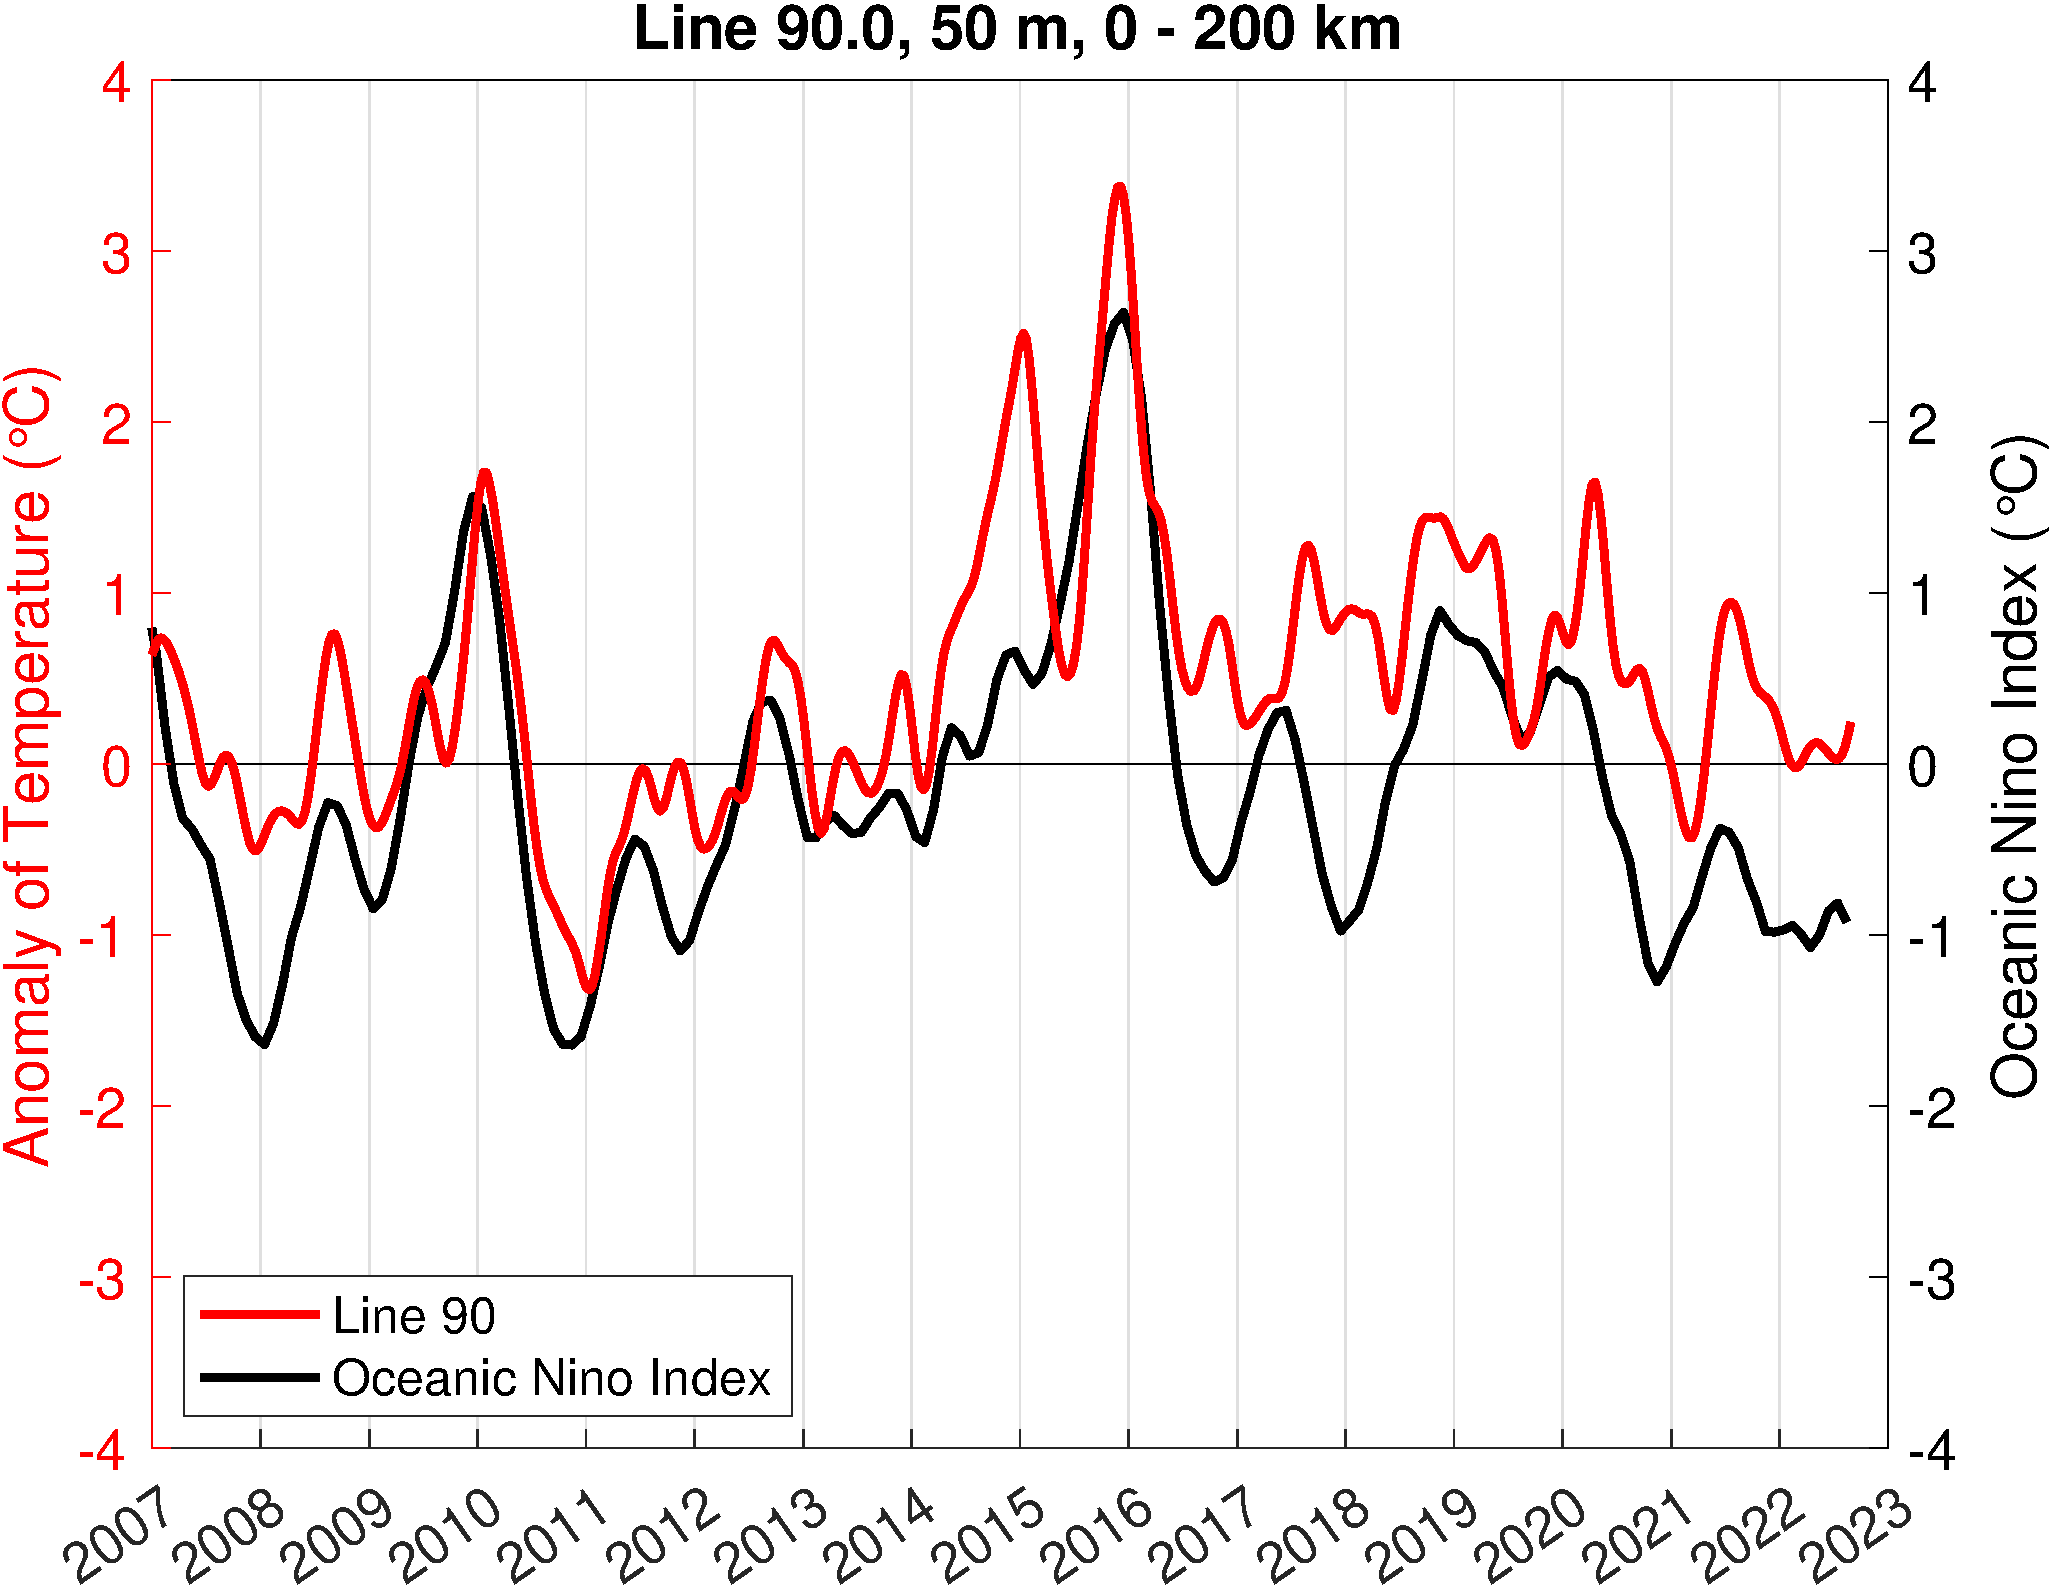

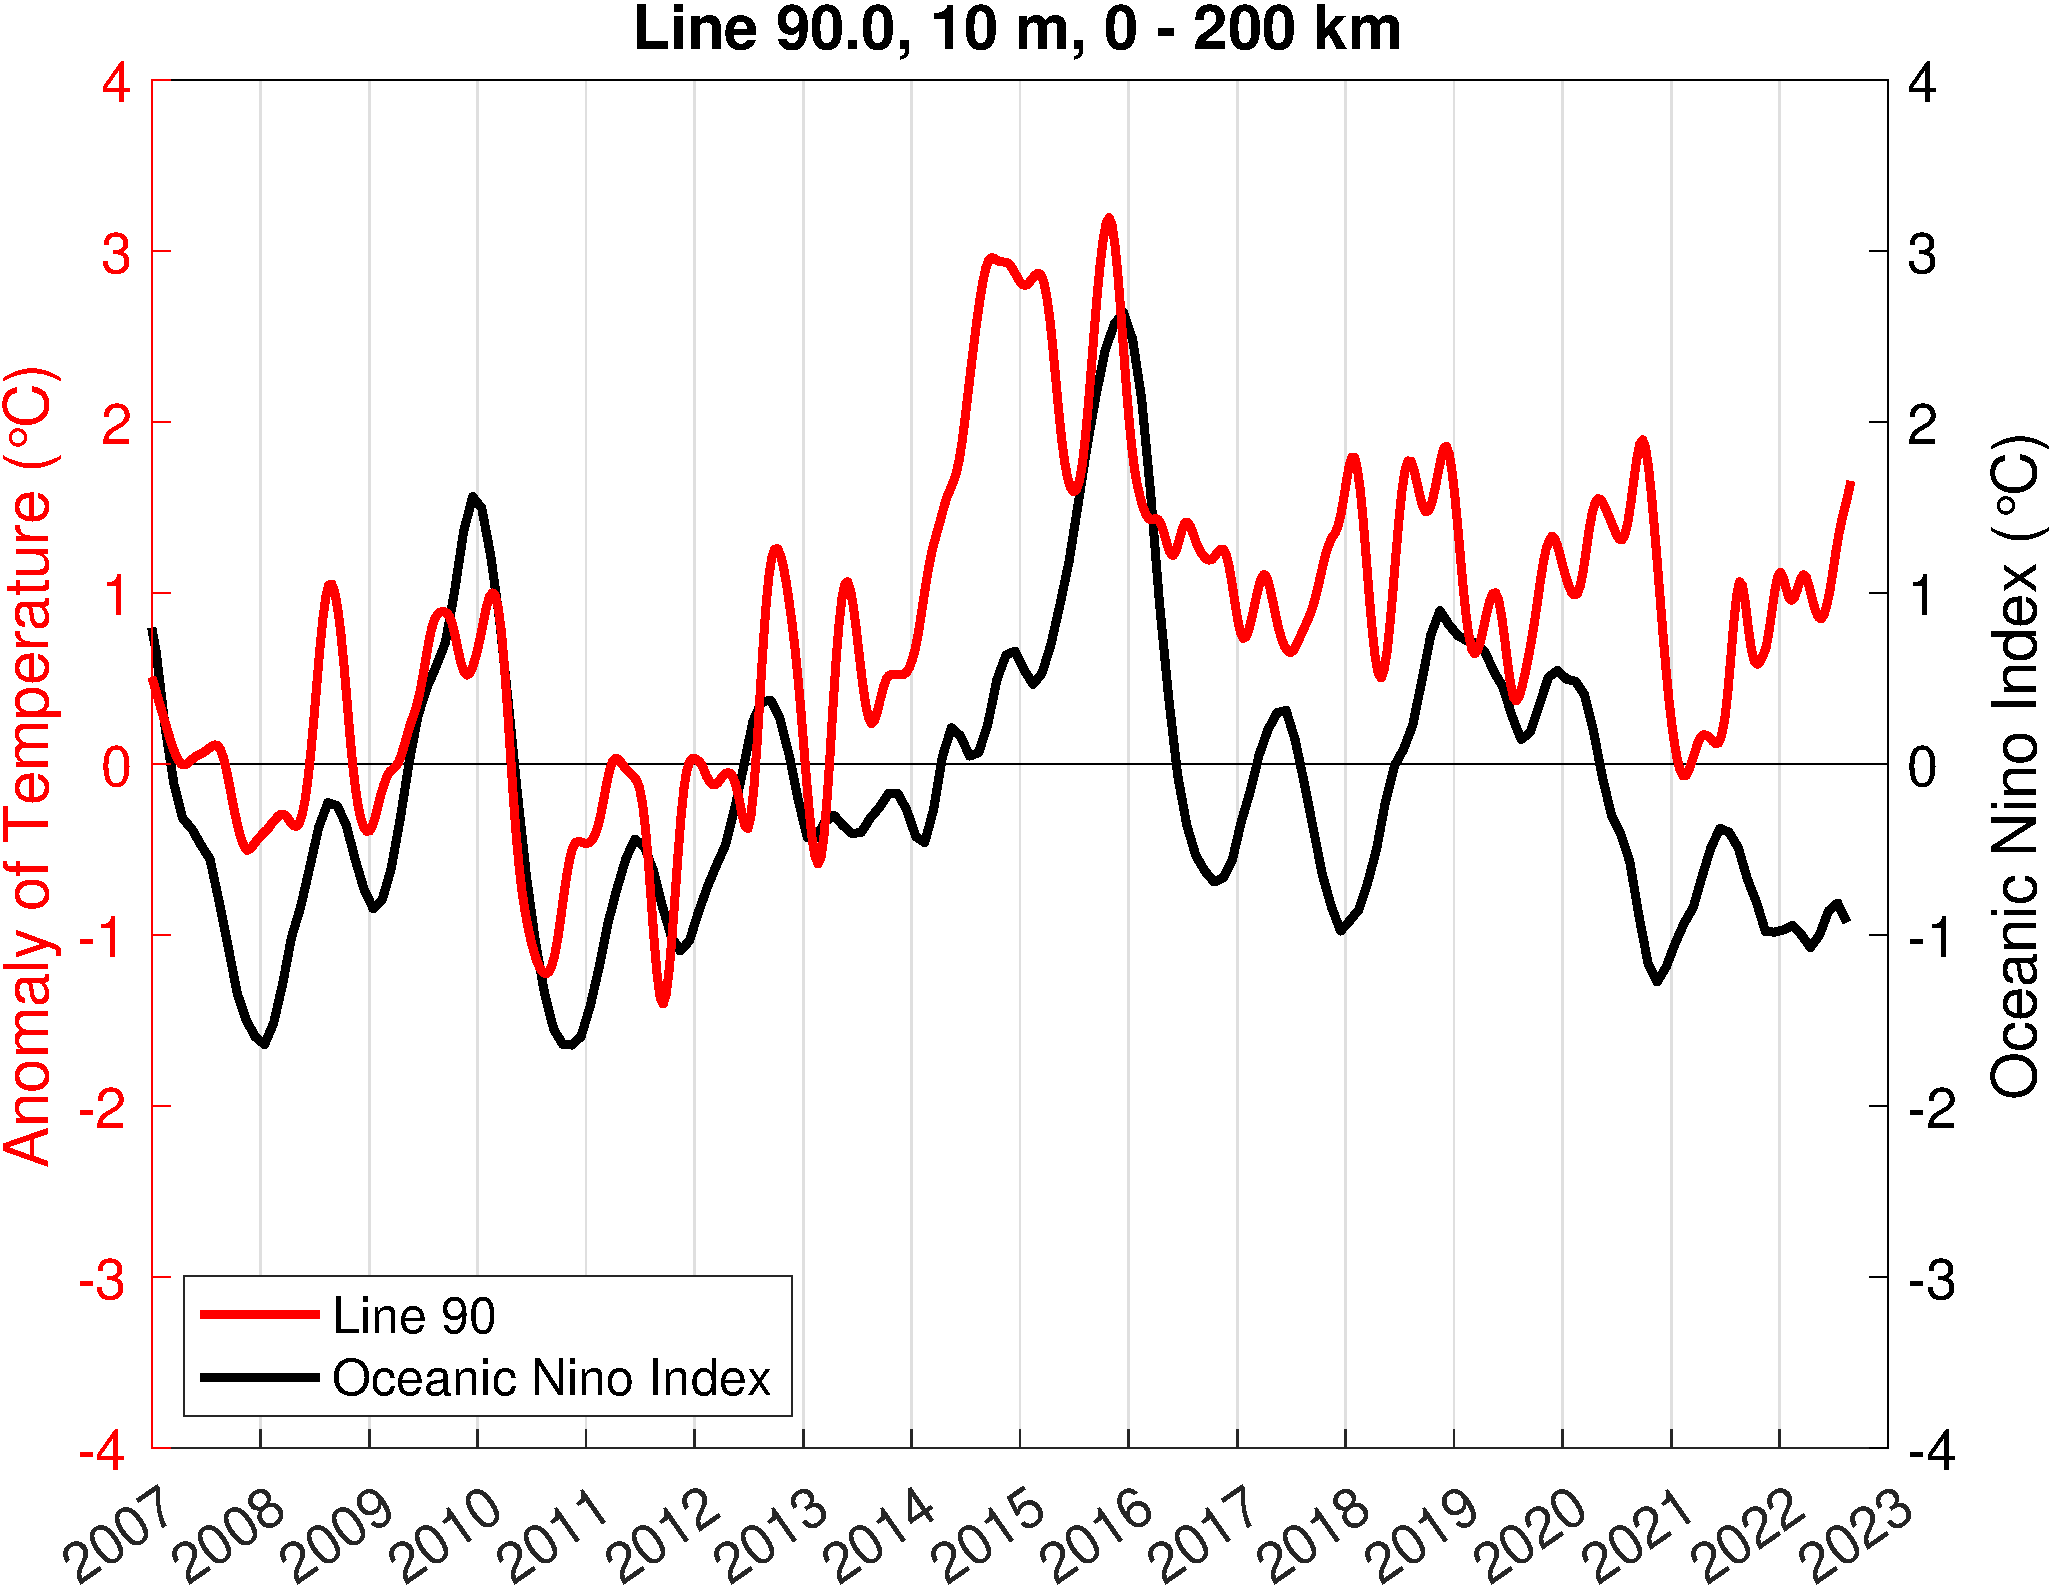


Figure S4A. The red lines are temperature anomalies at 50 m (left) and 10 m (right) on Line 90.0 averaged over the inshore 200 km. The black line is the Oceanic Nino Index (Nino 3.4). At 50 m, the temperature anomaly is near zero during 2022. This decrease from previously high values is consistent with La Nina conditions at the equator. At 10 m, the temperatures have remained high as they have been for several years.

Figure S4B


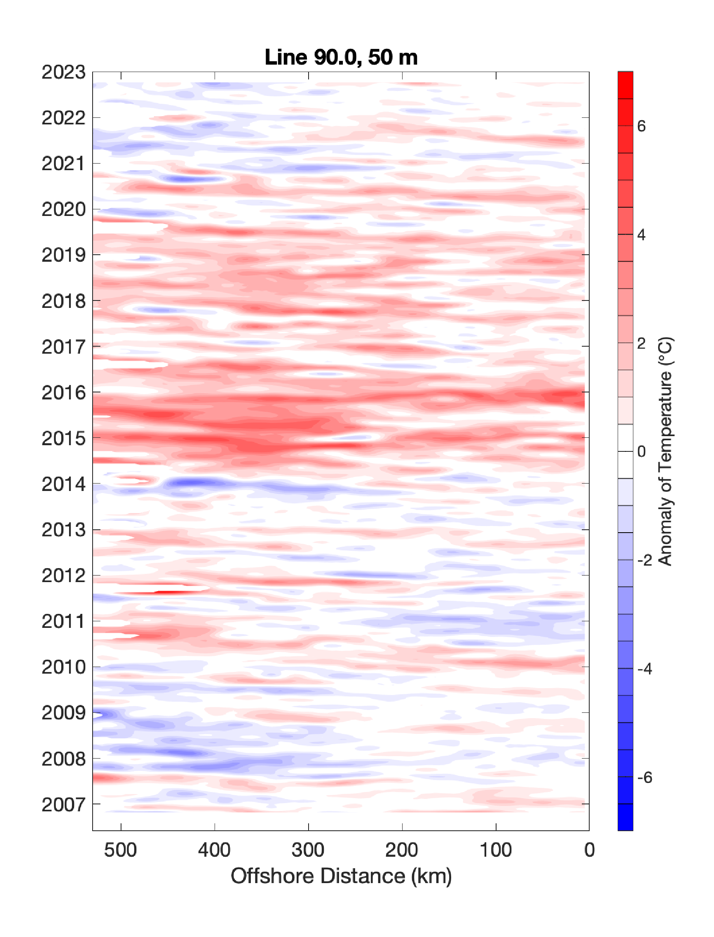

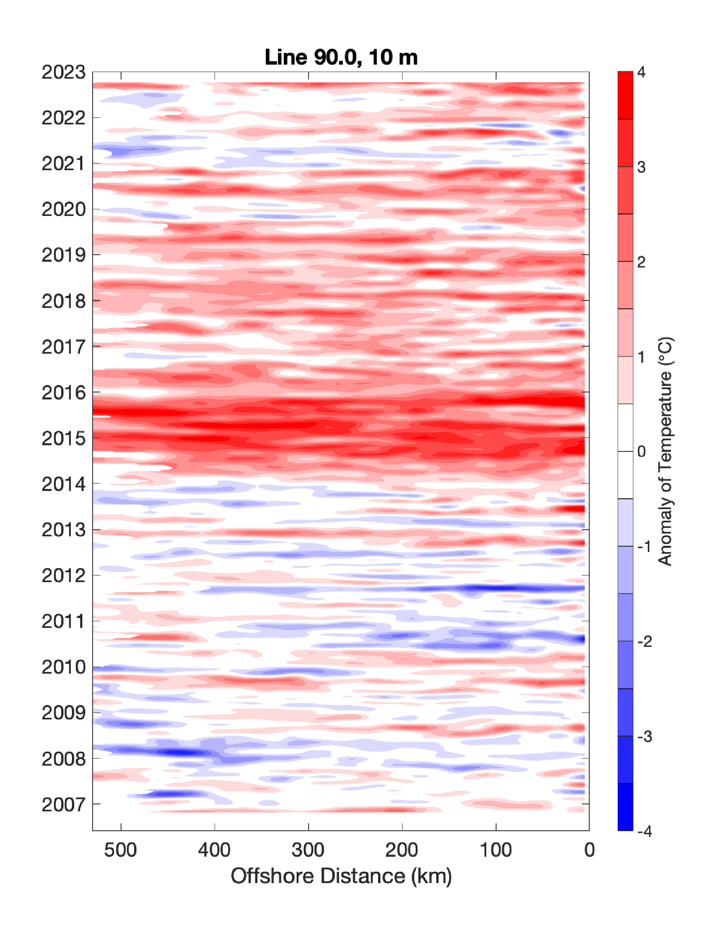


Figure S4B. Temperature anomaly at 50 m (left) and 10 m (right) on Line 90.0 as a function of offshore distance and time. The temperature anomaly is near zero at 50 m inshore of about 200 km, while at 10 m the temperature anomaly remains high. Temperature stratification has gone up during 2022.

Figure S4C


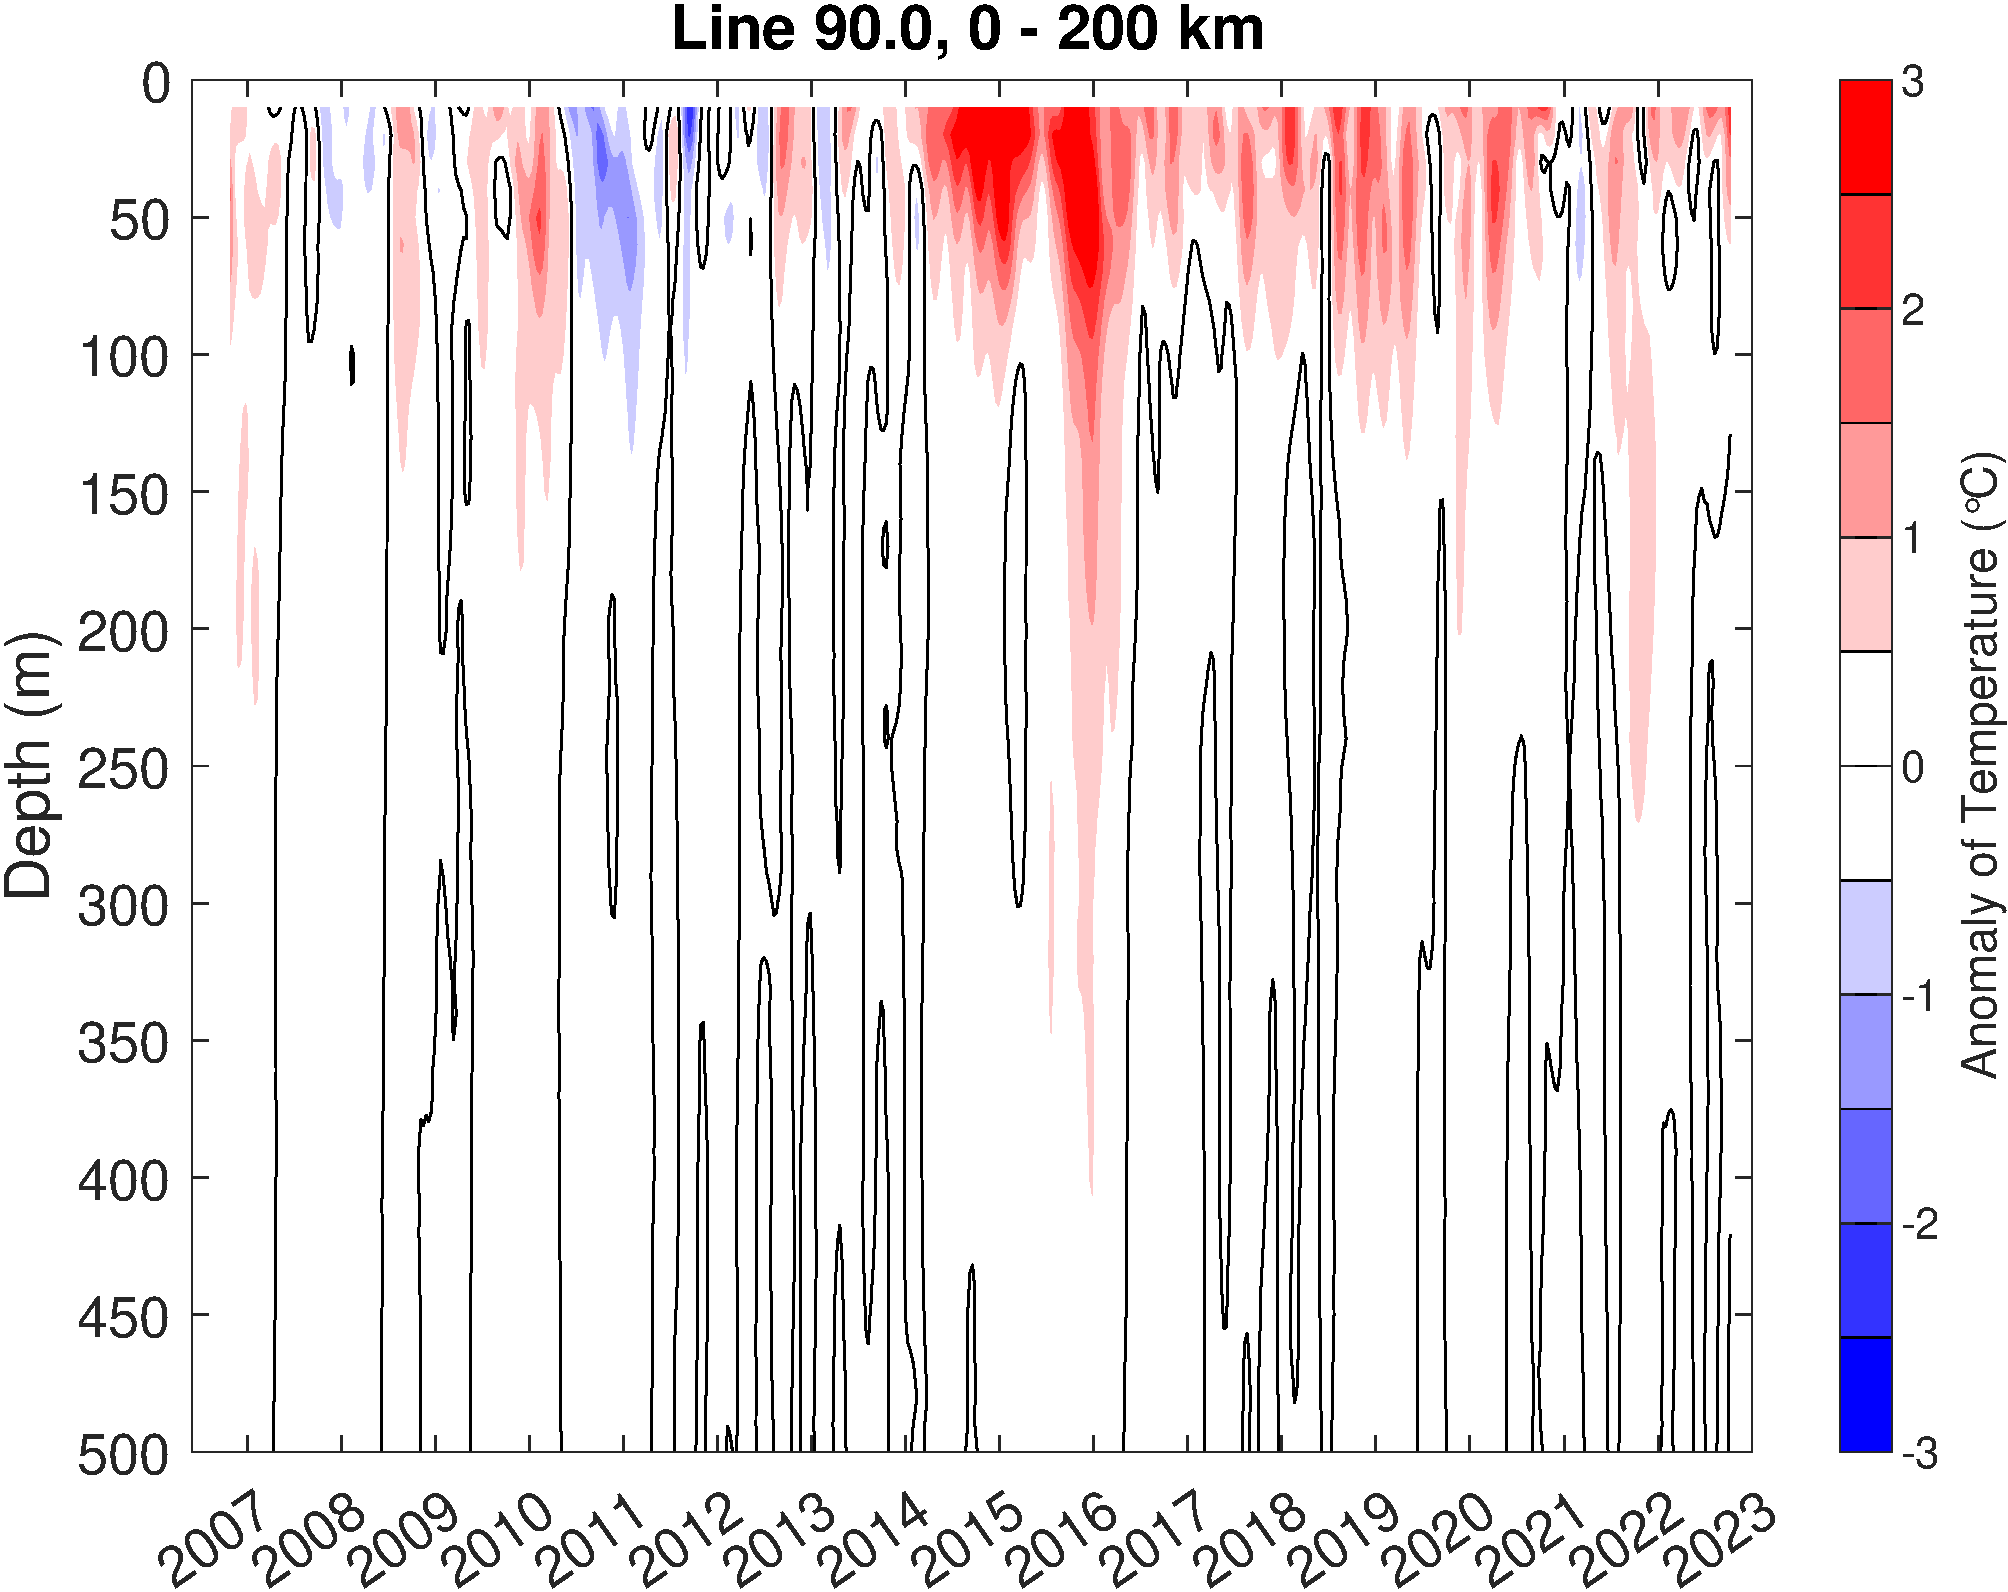


Figure S4C. Temperature anomaly on Line 90.0 averaged over the inshore 200 km as a function of time and depth. The temperature anomaly deeper than about 50 m has been near zero since the beginning of 2022. Since the temperature anomaly near the surface remains high, the stratification has increased.

Figure S4D


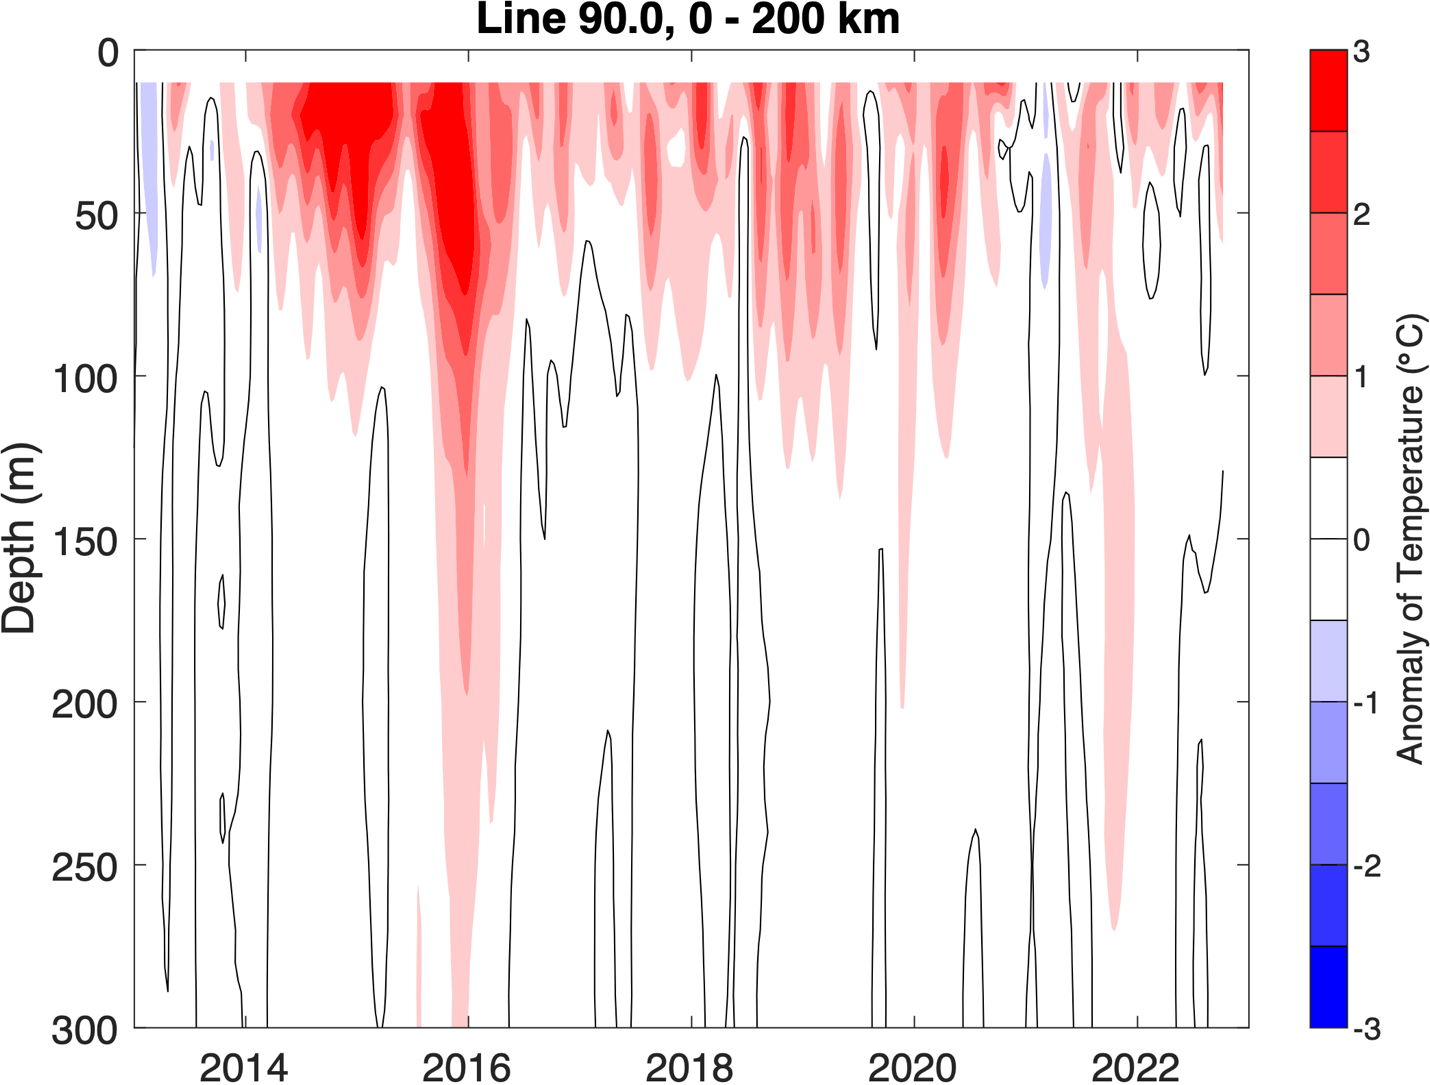


Figure S4D. Temperature anomaly on Line 90.0 averaged over the inshore 200 km as a function of time and depth, zoomed into the upper 300 km and since 2013.

**5. Ichthyoplankton and salmon dynamics in the northern California Current**

Many winter-spawned ichthyoplankton in the northern California Current (NCC) are consumed in spring and early summer by juvenile salmon upon entering the marine environment. By spring and summer, these winter-spawned prey fish are in their late-larval or early-juvenile stages and have grown to a size favored by juvenile salmon during their early marine residence, which is a critical time during the salmon life cycle (Daly et al. 2019; Thalmann et al. 2020; Crozier et al. 2021). Due to challenges in directly sampling the late-larval and early-juvenile life stages of most marine fishes (Brodeur et al. 2011), we utilize the winter ichthyoplankton biomass of coastal taxa (Index of Coastal Prey Biomass [ICPB]) as well as the community composition of winter ichthyoplankton as indices of prey availability and quality for salmon migrating in late spring and early summer. Obviously, in using these indices, we are assuming some level of consistency in the mortality rates from larval to juvenile stages of these marine fish; an assumption that may vary over time. Samples are collected every two weeks from January-March (weather/boat permitting) from the Newport Hydrographic (NH) line at 44.65˚N, 124.18–124.65˚W, and only stations 9-46 km from shore were included in the indices due to consistency of sampling.

In winter (January-March) of 2022, the ICPB was below the long-term mean and the biomass was ranked in 14th place in the 25-yr time series, suggesting below prey biomass for out-migrating salmon (Table S5A; Fig. S5A). The community composition of ichthyoplankton in 2022 had a higher proportion of coastal taxa than offshore taxa than any year since 2014, yet the community was still in the middle of the ordination plot between warm and cold ocean conditions (Fig. S5B-C). These results suggest close-to-average (community) and below-average (ICPB) prey conditions for piscivorous juvenile salmon that out-migrated in 20212(Figs. S5A-C).

Ocean conditions in fall/early winter were anomalously above-average SSTarc (Johnstone and Mantua 2014) from Oct-Dec 2015 through Oct-Dec 2021, and for the first time since 2013, the SSTarc temperatures in fall/early winter were below average in 2021 (Fig. s5C). The fall season is the physical and biological pre-conditioning period in the NCC (Schroeder et al. 2013; Santora et al. 2020), which is correlated with the winter-spawned ichthyoplankton community and biomass (Daly et al. 2019). Even with these cooler than average ocean temperatures, the ICPB was below average in January-March 2022 than would be expected given the below-average October-December 2021 ocean SSTarc anomalies. The return of adult coho salmon in 2021 (out-migrated as juveniles in spring of 2020) were the 5th highest of the last 24-yrs and the highest seen since 2013 out-migration year (Fig. S5D), and while spring Chinook adult salmon returns in 2022 (2020 out-migration year) were also the highest seen since 2013 out-migration year, their returns were just slightly above the long-term mean (Fig. S5D). Coho salmon adult returns from 2021 outmigration year returned in above average numbers in 2022, but less than the previous year. Steelhead continue to return in very low numbers relative to the long term mean, and fall Chinook salmon adult counts were above average from outmigration year 2020 (Fig. S5D).

**REFERENCES**

Auth, T.D., Daly, E.A., Brodeur, R.D., and Fisher, J.L. 2018. Phenological and distributional shifts in ichthyoplankton associated with recent warming in the northeast Pacific Ocean. Glob. Chang. Biol. 24:259-272.

Brodeur, R.D., Auth, T.D., Britt, T., Daly, E.A., Litz, M.N.C., and Emmett, R.L. 2011. Dynamics of larval and juvenile rockfish (*Sebastes* spp.) recruitment in coastal waters of the Northern California Current. ICES CM 2011/H:12.

Crozier, L.G., Burke, B.J., Chasco, B.E. Widener, W.L., and Zabel, R.W. 2021. Climate change threatens Chinook salmon throughout their life cycle. Commun. Biol. <https://doi.org/10.1038/s42003-021-01734-w>

Daly, E.A., Auth, T.D., and Brodeur, R.D. 2019. Changes in juvenile salmon prey fields associated with a recent marine heat wave in the Northern California Current. Anomalous ocean conditions in 2015: impacts on spring Chinook salmon and their prey field.  N. Pac. Anadr. Fish Comm. Tech. Rep. 15. doi:10.23849/npafctr15/71.74.

Daly, E.A, Brodeur, R.D., Morgan, C.A., Burke, B.J., and Huff, D.H. In Press. Prey selectivity and diet partitioning of juvenile salmon in coastal waters in relation to prey biomass and implications for salmon early marine survival. N. Pac. Anadr. Fish Comm. Tech. Rep. 18.

Johnstone, J.A. and, Mantua, N.J. 2014. Atmospheric controls on northeast Pacific temperature variability and change, 1900-2012. Proc. Natl. Acad. Sci. 111(40):14360-14365.

Schroeder, I.D., Black, B.A., Sydeman, W.J., Bograd, S.J., Hazen, E.L., Santora, J.A., and Wells, B.K. 2013. The north Pacific high and wintertime pre-conditioning of California current productivity. Geophys. Res. Lett. 41: 541-546.

Santora, J.A., Mantua, N.J., Schroeder, I.D., Fields, J.C., Hazen, E.L., Bograd, S.J., Sydeman, W.J., Wells, B.K., Calambokidis, J., Saez, L., Lawson, D., and Forney, K.A. 2020. Habitat compression and ecosystem shifts as potential links between marine heatwave and record whale entanglements. Nat. Commun. https://doi.org/10.1038/s41467-019-14215-w

Thalmann, H.L., Daly, E.A., and R.D. Brodeur. 2020. Two anomalously warm years in the northern California current: impacts on early marine steelhead diet composition, morphology, and potential survival. Trans. Am. Fish. Soc. 149:369-382.

Table S5A. Index of coastal prey biomass (ICPB) from 1998-2022 sampled in January-March along the Newport Hydrographic (NH) line, the rank of the biomass from highest (1) to lowest (25), Axis-1 principal coordinate community analysis on the composition of coastal and offshore taxa by year, and the rank of the community from coastal taxa dominated (1 = most coastal taxa) to offshore taxa dominated (25 = most offshore taxa).

| Year | ICPB (Log10[mg C 1000 m-3]) | Rank biomass | Coastal and offshore taxa composition axis 1 PCO scores | Rank PCO |
| --- | --- | --- | --- | --- |
| 1998 | 0.48 | 19 | 9.47 | 11 |
| 1999 | 1.64 | 4 | 20.48 | 6 |
| 2000 | 0.97 | 13 | 28.88 | 5 |
| 2001 | 1.27 | 7 | 14.52 | 8 |
| 2002 | 1.95 | 1 | 14.07 | 10 |
| 2003 | 0.4 | 23 | 2.34 | 13 |
| 2004 | 0.32 | 24 | -19.35 | 19 |
| 2005 | 0.49 | 18 | -33.10 | 23 |
| 2006 | 1.16 | 10 | 35.22 | 1 |
| 2007 | 0.48 | 20 | -8.97 | 16 |
| 2008 | 1.64 | 3 | 31.82 | 3 |
| 2009 | 0.62 | 15 | 3.81 | 12 |
| 2010 | 1.87 | 2 | -11.22 | 17 |
| 2011 | 1.21 | 9 | 29.45 | 4 |
| 2012 | 1.55 | 5 | 32.87 | 2 |
| 2013 | 1.09 | 12 | 16.80 | 7 |
| 2014 | 0.46 | 21 | 14.22 | 9 |
| 2015 | 0.51 | 16 | -30.31 | 21 |
| 2016 | 0.49 | 17 | -33.55 | 24 |
| 2017 | 0.64 | 14 | -38.81 | 25 |
| 2018 | 1.12 | 11 | -28.81 | 20 |
| 2019 | 0.43 | 22 | -32.43 | 22 |
| 2020 | 1.25 | 8 | -12.75 | 18 |
| 2021 | 1.39 | 6 | -3.85 | 15 |
| 2022 | 0.73 | 14 | -0.80 | 14 |

Figure S5A. Annual average biomass of ichthyoplankton from winter (January-March) collected along the Newport Hydrographic (NH) line at stations NH05-25. Taxa listed in color are considered coastal and make up the index of coastal prey biomass (ICPB), and taxa in white pattern are considered offshore.

Figure S5B. Principal coordinate analysis of the prey composition of winter ichthyoplankton. Red symbols indicate warmer-than-average October-December sea surface temperatures (SSTarc) in the months prior to the winter ichthyoplankton collections, and blue indicates colder-than-average. The larvae were collected during winter (January–March) in 1998–2022 along the Newport Hydrographic (NH) line off the coast of Oregon (44.65˚N, 124.18–124.65˚W).

Figure S5C. Anomalies of the Index of Coastal Prey Biomass (ICPB), Ichthyoplankton PCO axis-1 scores, and the October-December sea surface temperature (SSTarc) lagged by 1-yr.

Figure S5D. Anomalies of the coastal and the five taxa ichthyoplankton biomass (no lag) and the adult salmon counts at Bonneville Dam lagged by time typically spent in ocean (two years for spring and fall Chinook salmon and steelhead and unmarked steelhead; and 1 year for coho salmon).

**6. Ichthyoplankton and juvenile/adult fish collected in May-July along the northern California Current**

Ichthyoplankton samples were collected from 3-4 stations representing coastal (< 100 m in depth), shelf (100-1000 m), and offshore (> 1000 m) regions along both the Newport Hydrographic (NH; 44.65°N, 124.35-125.12°W) and Columbia River (CR; 46.16°N, 124.22-125.18°W) lines off the coast of Oregon during May-July in 2007-22 (For complete sampling methods, see Auth (2011); no sampling was conducted in 2020). In addition, post-larval (i.e., juvenile and adult) fish were collected using a modified-Cobb midwater trawl (MWT) with a 26-m headrope and a 9.5-mm codend liner fished for 15 min at a headrope depth of 30 m and ship speed of ~2 kt. MWT collections were made at 3-6 evenly-spaced, cross-shelf stations representing coastal, shelf, and offshore regions along nine half-degree latitudinal transects between 42.0 and 46.0°N latitude in the northern California Current region during May-July in 2011-22 (no sampling was conducted in 2012 or 2020). Sampled volume was assumed to be uniform for all hauls. All fish collected were counted and identified to the lowest taxonomic level possible onboard, although pre-recruit rockfish (*Sebastes* spp.) were frozen and taken back to the lab for identification using precise meristic and pigmentation metrics.

Summarizing the early-life stage fish community dynamics in the NCC based on several sampling projects with varying degrees of spatial and temporal coverage, the ichthyoplankton assemblage in 2020 normalized to pre-marine heatwave conditions, while 2021-22 revealed a novel combination of warm (offshore/southern) and cold (onshore/northern) assemblages and the presence of rare taxa (Fig S6A). Smelt (cold taxon) larvae were present in winter-summer 2021 and 2022, and sardine (Sardinops sagax; warm taxon) were present in winter-summer 2021 and April 2022, whereas sardine larvae are not normally found at all in the NCC (usually south) or just in summer, and smelt larvae normally just occur in winter. Larger young-of-the year (YOY) sardine and smelt were also found in May-June 2021 and 2022, suggesting successful recruitment to the later life-stage. Additionally, there were relatively high concentrations of rare, northern taxa such as flathead sole (*Hippoglossoides elassodon*) and arrowtooth flounder (*Atheresthes stomias*) in winter-spring 2021 and 2022, with YOY of those taxa present in May-June, also indicating successful pelagic recruitment to that later life-stage. And, the first-ever (for the NCC 2004-22 mid-water sampling), rare age1 flathead sole was collected in May 2022, suggesting that the record-high 2021 YOY year’s cohort of this rare species for this region is surviving. Abnormally low concentrations of anchovy and sanddab (*Citharichthys* spp.) larvae were found in 2020-21, but the larvae of both taxa returned to almost normal levels in summer 2022. In 2022, there was also low overall sample biovolume (except for ctenophores at several stations) and relatively low larval and YOY fish concentrations (except for moderate-high rockfishes).

The post-larval fish community in the northern California Current (NCC) in May-June 2022 had relatively low abundance for the 10-year time series, and was dominated by Myctophidae (Fig. S6B). The abundance and diversity of flatfishES was the second lowest in the time series, while smelt (Osmeridae) and Clupeiformes abundances were average. Rockfish abundance in 2022 was the fourth highest in the time-series, following record highs in 2019. Eight different identifiable taxa of rockfishES were collected in 2022, with the dominant species consisting of canary (*Sebastes pinniger*; 24% of total identifiable rockfish), shortbelly (*S. jordani*; 22%), yellowtail (*S. flavidus*; 19%), darkblotch (*S. crameri*; 18%), widow (*S. entomelas*; 9%), yellowmouth (*S. reedi*; 4%), and black (*S. melanops*) and blue (*S. mystinus*) at 1% each. In addition, a moderate-high number of pyrosomes were collected in the NCC in 2021-22, whereas only one small pyrosome was collected in 2019 (no sampling was conducted in 2020) after being found in extraordinarily high numbers throughout the sampling area in 2016-18.

Auth, T.D. 2011. Analysis of the spring-fall epipelagic ichthyoplankton community in the northern California Current in 2004-2009 and its relation to environmental factors. Calif. Coop. Oceanic. Fish. Invest. Rep. 52:148-167.

Fig. S6A. Mean concentrations (no. 103 m3) of the dominant larval fish taxa collected during May-July in 2007-22 along the Newport Hydrographic (NH; 44.65oN, 124.35-125.12oW) and Columbia River (CR; 46.16oN, 124.22-125.18oW) lines off the coast of Oregon. * = no samples were collected in 2020.


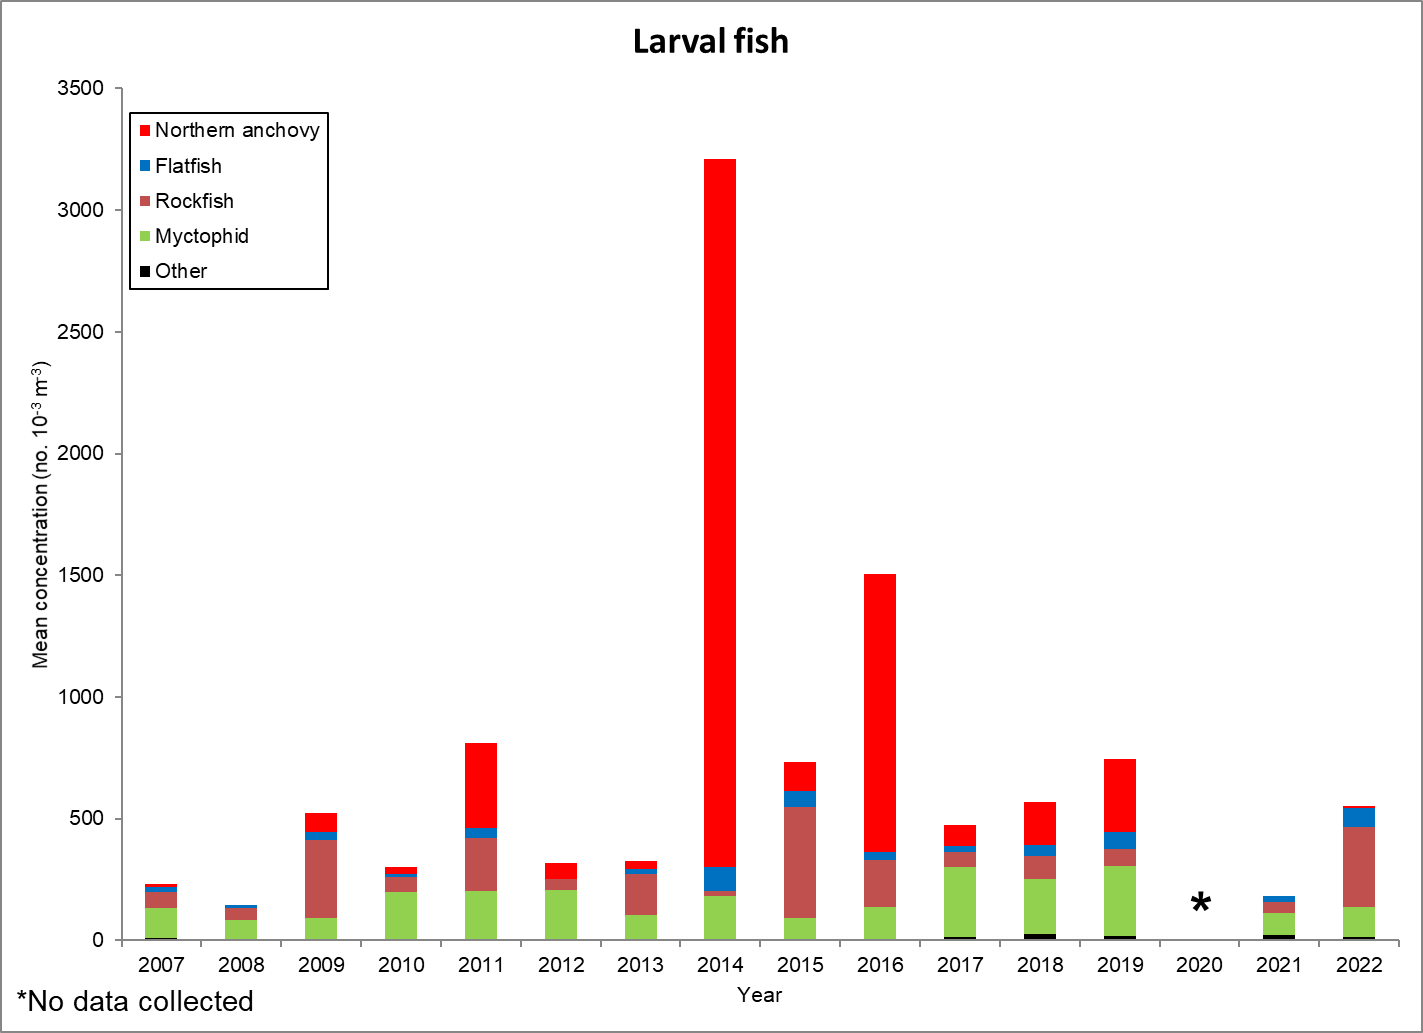


Fig. S6B. Mean catches (no. haul-1) of the dominant post-larval fish taxa collected during May-July in 2011-22 along nine half-degree latitudinal transects between 42.0 and 46.0oN latitude in the northern California Current region. * = no samples were collected in 2012 and 2020.


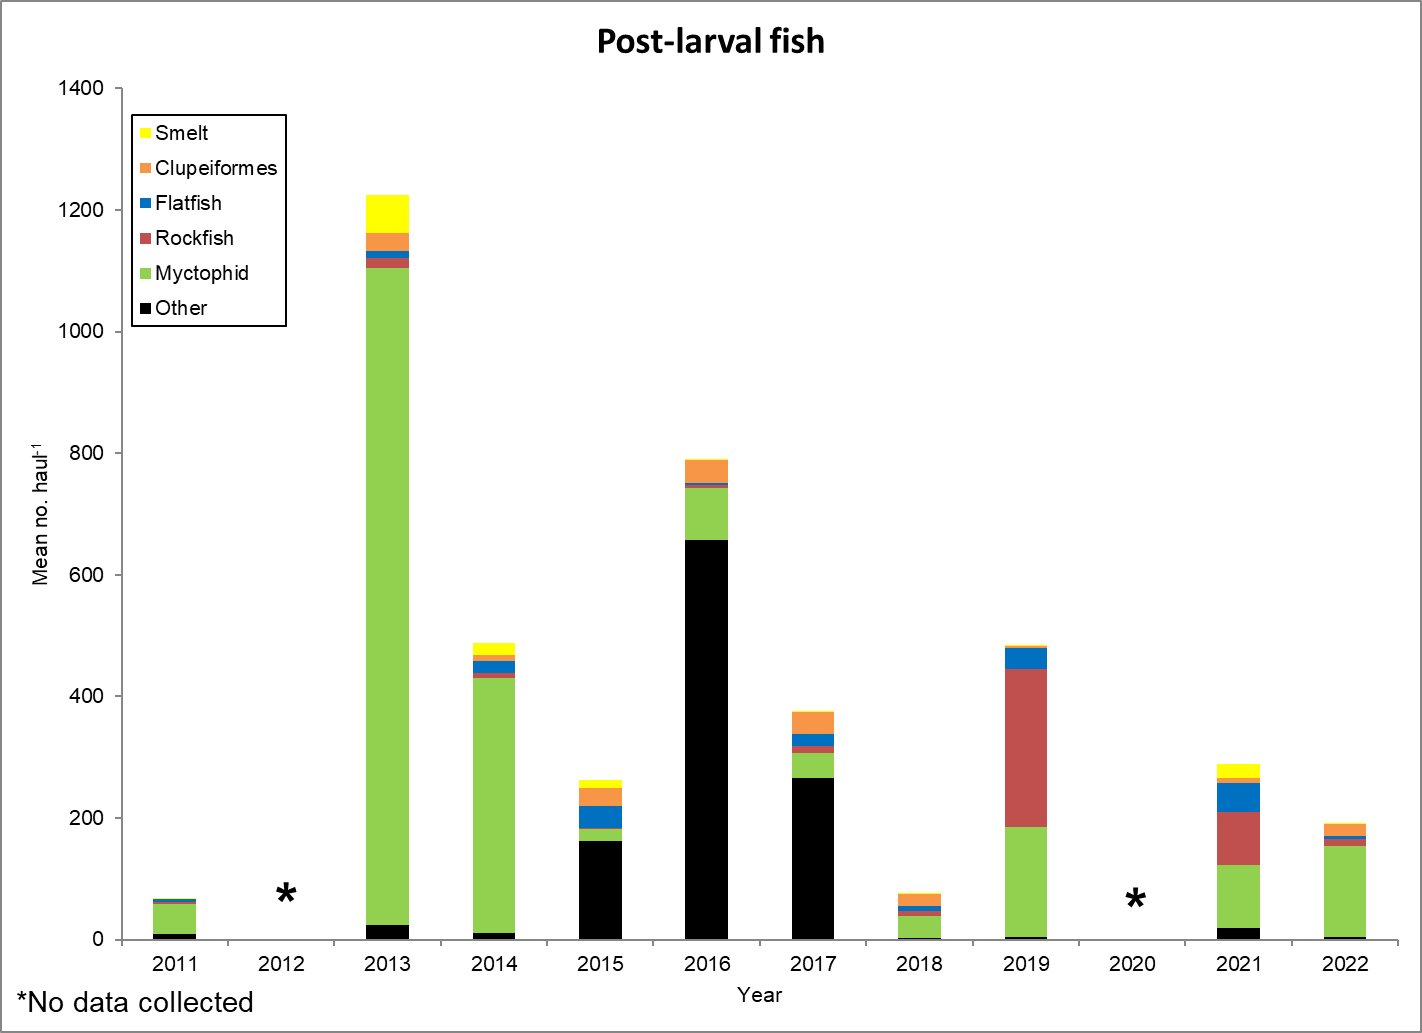


**7. Juvenile Salmon Ocean Ecology Survey in Oregon/Washington**

Beginning in 2015, the jellyfish community off Washington and Oregon transitioned from the large, cool-water scyphozoan species, sea nettle (*Chrysaora fuscescens*), which had been numerically dominant, to the more offshore-oriented water jellyfish (*Aequorea* spp.). By 2019, both sea nettle and water jellyfish returned to average densities. In 2022, catches of both species of jellyfish were low compared to the previous 23 years (Fig. S7).

Figure S7. Catch per unit effort mean (Log10((Number per km trawled +1))) of sea nettle and water jellyfish off Washington and Oregon from 1999–2022. The gray dotted line is the time-series mean catch.


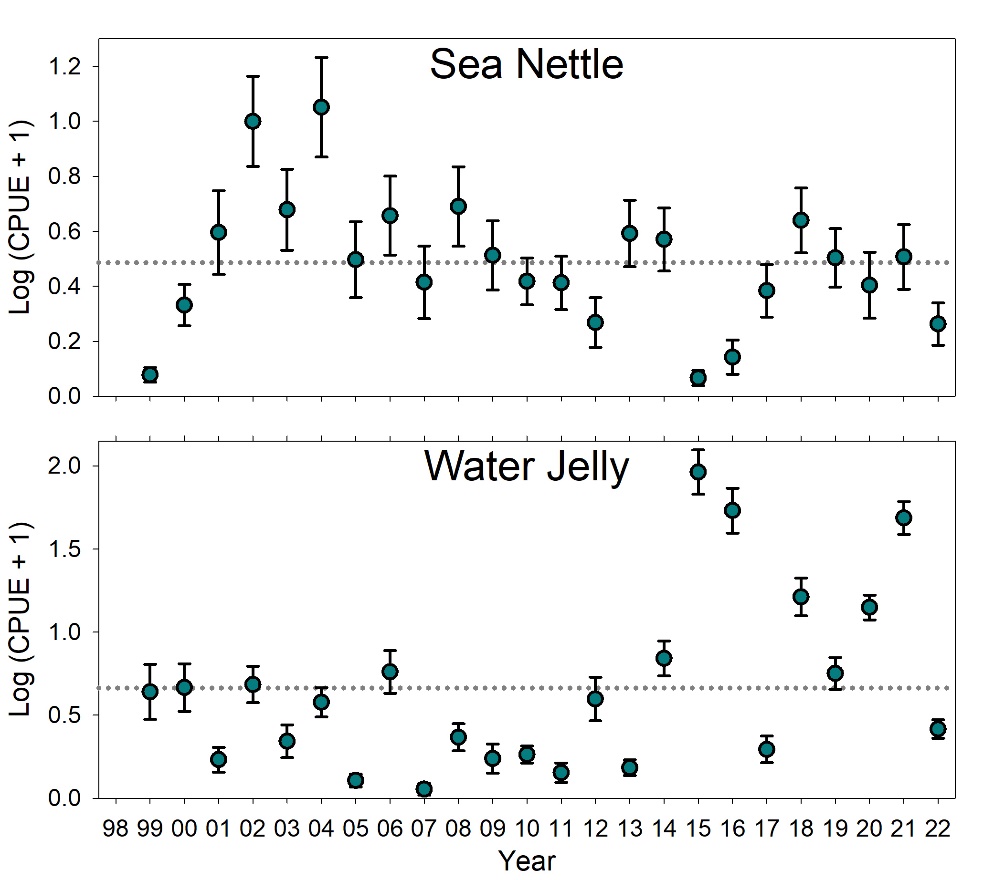


**8. CalCOFI CUFES**

Continuous Underway Fish Egg Surveys, where surface water is pumped onto an in-transit vessel and egg numbers are enumerated at regular intervals (Checkley et al. 1997) were conducted on various NOAA cruises. In 2022, the highest anchovy egg counts were near the shelf break south of Point Conception (Fig. S8). This was different than past years when eggs were mostly over the shelf. Sardine egg density in 2022 were low overall but most common in central California off Monterey Bay. Jack mackerel were spread throughout central and southern California but also at low densities.

Fig. S8. Egg counts of anchovy (2016-2022), sardine (2022) and jack mackerel (2022). Note that the magnitude of the scale bars are very different for the three species.


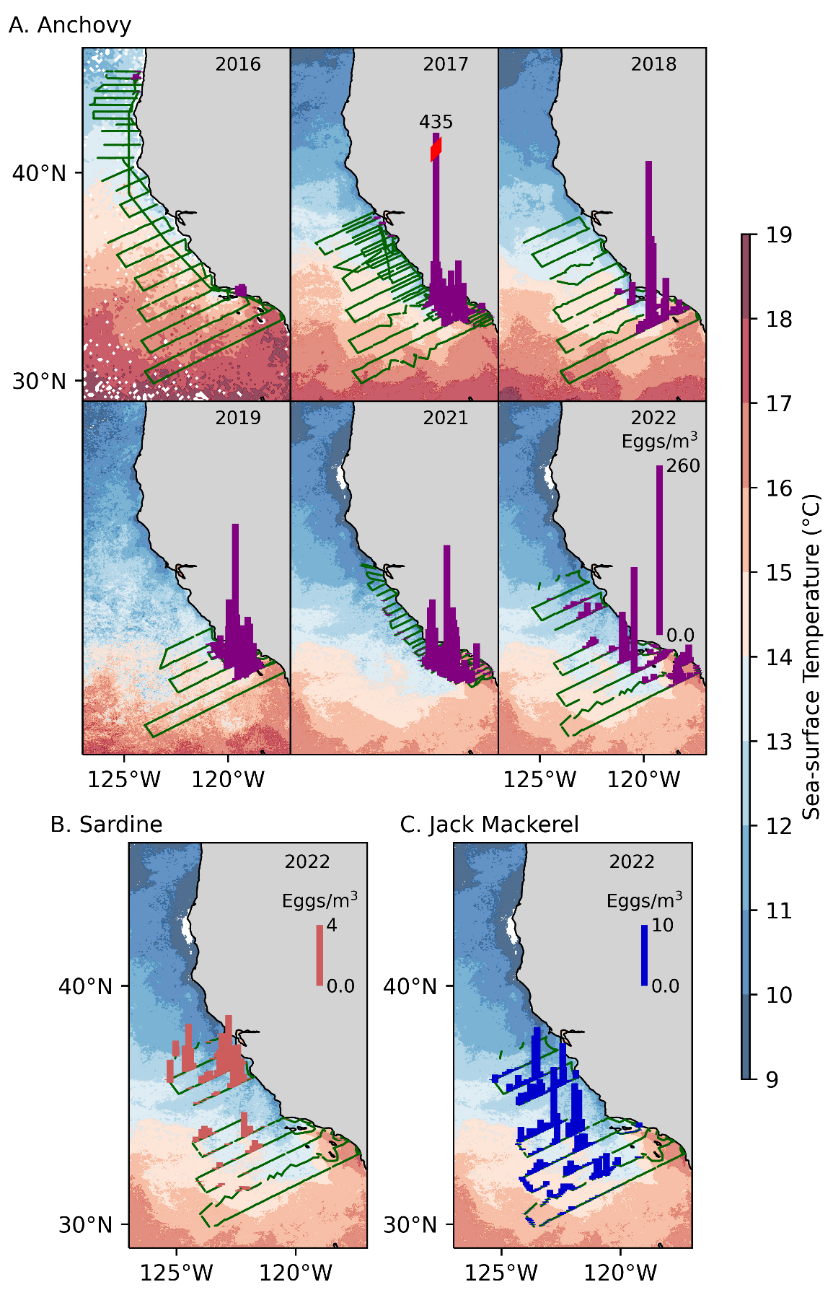


Diets were assessed via stomach content analysis for two highly migratory predators that forage seasonally in the CCLME: Juvenile Albacore Tuna (*Thunnus alalunga*) and Broadbill Swordfish (*Xiphias gladius*, Fig S9). Albacore were collected off Northern California, Oregon, and Washington by commercial and recreational fishers during the summer and fall and processed following Nickels *et al*. (2023). Swordfish were collected off Southern and Central California during the commercial drift gillnet season (August 15th through January 31st, classified by the year the fishing season began), and were processed following Preti *et al*. (2023). Swordfish were larger on average and Swordfish prey were generally larger with the exception of one large Market Squid consumed by an Albacore Tuna (of six with lengths available). A subset of prey species are presented here focusing on those that are commercially important in the California Current Ecosystem. The most important prey for Albacore in 2021 was Pacific Saury (*Cololabis saira*). Anchovy (*Engraulis mordax*) have been important prey for Albacore throughout the timeseries, but consumption has been below the long term mean since 2018. In contrast, Anchovy became important for Swordfish in 2016 and have remained relevant to the present. North Pacific Hake (*Merluccius productus*) was the most important prey for Swordfish in 2021, with a record high mean proportional abundance of 32% of diet. Both species consume a broad range of prey with significant shifts in diet composition over relatively short time periods.

References:

Nickels, C.F., Portner, E.J., Snodgrass, O., Muhling, B, and Dewar, H. (2023) Juvenile Albacore tuna (*Thunnus alalunga*) foraging ecology varies with environmental conditions in the California Current Large Marine Ecosystem. *Fisheries Oceanography*, 32(5): 431-447.

Preti, A., Stohs, S.M., DiNardo, G.T., Saavedra, C., MacKenzie, K., Noble, L.R., Jones, C.S. and Pierce, G.J., 2023. Feeding ecology of broadbill swordfish (*Xiphias gladius*) in the California current. *PloS one*, *18*(2), p.e0258011.

Fig. S9. Summary of the diet monitoring programs for Juvenile Albacore Tuna (*Thunnus alalunga*) and Broadbill Swordfish (*Xiphias gladius*). Upper left plot shows collection regions for Albacore (orange) and Swordfish (blue). Middle left plot shows fork lengths (cm) of predators included in the diet analyses. Mean lengths (black diamond) and boxplots of length distributions for forage fishes (light grey) and Market Squid (dark grey) are depicted on the lower left. The right panel shows the annual mean proportional abundance of prey as a heat map, where the color saturates at 30%.


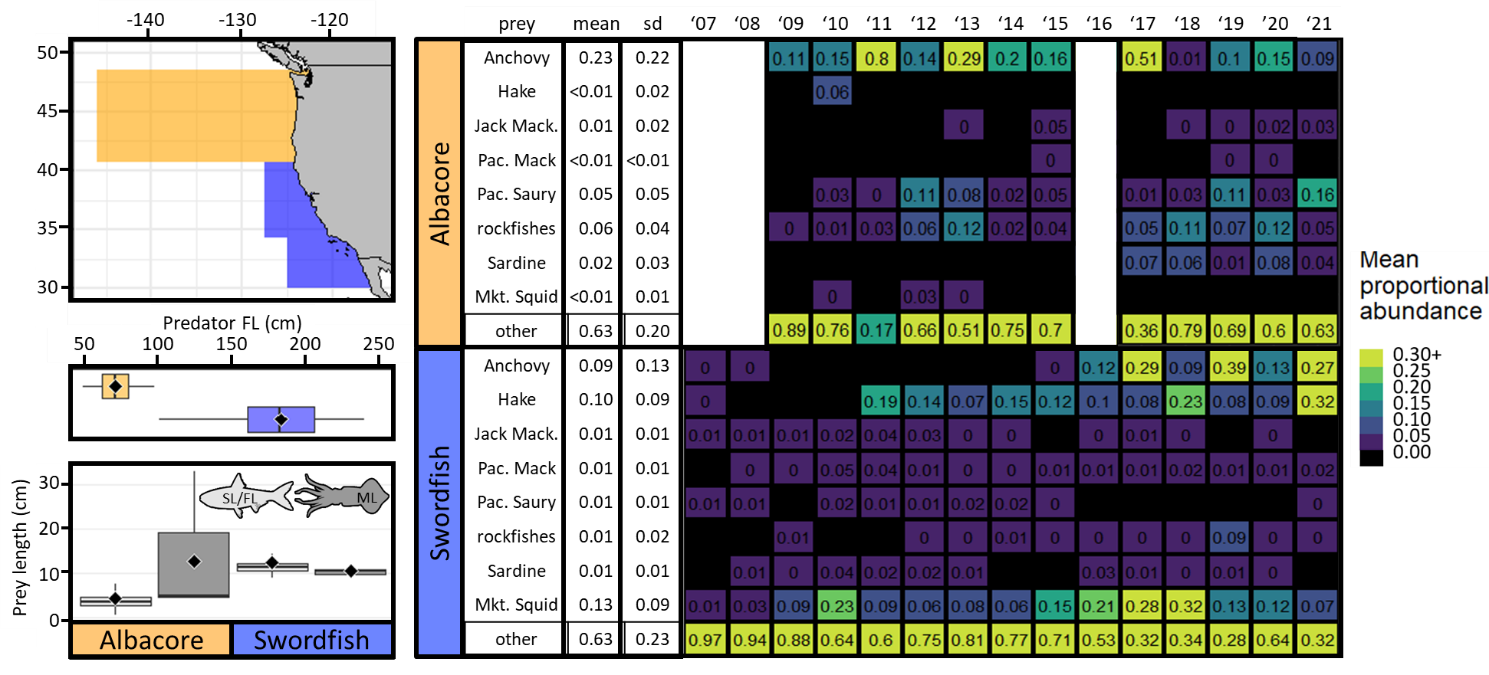


**10. Marine Mammals**

**Methods:** CalCOFI marine mammal visual surveys were conducted during daylight hours while the ship was in transit between CalCOFI sampling stations. For the three 2022 surveys, two experienced observers recorded sightings of marine mammal species; following the visual observation protocols detailed in Campbell et al. (2015). The winter 2022 survey was canceled due to the COVID-19 pandemic and the spring survey, as is normal in spring, was extended with transects up to San Francisco. On-effort, on-transect cetacean sightings were plotted along the CalCOFI cruise track to investigate spatial patterns for 2022 surveys. Long-term temporal patterns of encounter rates were investigated by scaling sightings by total observational effort (km) per survey, as outlined in Giddings (2022). Here, we report sightings from 2022, and long-term temporal patterns between 2004-2022*.*

**Results***:* Thirteen species of cetaceans were sighted during the 2022 CalCOFI visual surveys (Tables S10A & B). Of those thirteen, four species were in suborder Mysticeti (baleen whales), and nine were in the suborder Odontoceti (toothed whales). Seasonal scaled sightings of humpback whales were higher in fall of 2022 than any previous survey dating back to 2004 (Fig. S10A). Fall 2022 humpback whale sightings occurred mostly in the Santa Barbara Channel, between the Channel Islands and Point Conception (Fig. S10B). Scaled sightings of blue and fin whales were lower in summer 2022 than they were in summer 2021, and sightings were distributed throughout the survey region (Fig. S10A, Fig S10B.). Short-beaked common dolphins were the most abundantly observed toothed whale in 2022, with the majority of sightings occurring offshore of the continental slope (Table S10B, Fig. S10C). Long-beaked common dolphin sightings were the second highest and were observed closer inshore than short-beaked common dolphins (Table S10B2, Fig. 10SC). Bottlenose dolphin scaled sightings were lower in 2022 than previous recent years (Fig. S10B). Lastly, scaled sightings of Dall’s porpoise appear to be declining in the core CalCOFI survey region (transect lines 93 -76) from 2010 through 2022 (Fig. S10B).

References:

Campbell, G. S., Thomas, L., Whitaker, K., Douglas, A. B., Calambokidis, J., & Hildebrand, J. A. (2015). Inter-annual and seasonal trends in cetacean distribution, density and abundance off southern California. *Deep Sea Research Part II: Topical Studies in Oceanography*, *112*, 143–157.

Giddings, K.A.A., (2022). Climate, Circulation, Chlorophyll, and Cetaceans in the California Current. *Doctoral Dissertation, UC San Diego.*

Calambokidis, J., G. H. Steiger, K. Rasmussen, *et al*. (2000). Migratory destinations of humpback whales that feed off California, Oregon and Washington. *Marine Ecology Progress Series* 192: 295– 304.

Thompson, A. R., et al. (2022). State of the California Current Ecosystem in 2021: Winter is coming? *Frontiers in Marine Science 9.*

Baker, C.S., Herman, L.M., Perry, A., Lawton, W.S., Straley, J.M., Straley, J.H., (1985) Population characteristics and migration of summer and late-season humpback whales (*Megaptera-Novaeangliae*) in southeastern Alaska. *Marine Mammal Science*, 1, 304– 323.

Fleming, A.H., Clark, C.T., Calambokidis, J., Barlow, J., (2016) Humpback whale diets respond to variance in ocean climate and ecosystem conditions in the California Current. *Glob Chang Biol*. Mar; 22(3):1214-24.

Nickels, C.F., Sala, L.M. and Ohman, M.D. (2019). *Limnol Oceanogr*, 64: 390-405.

Wachtendonk, R., Calambokidis, J., Flynn, K. (2022). Blue Whale Body Condition Assessed Over a 14-Year Period in the NE Pacific: Annual Variation and Connection to Measures of Ocean Productivity. *Frontiers in Marine Science 9:* 847032.

Table S10A. On-effort baleen whale sightings 2022. ULW = unidentified large whale.

| **2022** | **Species** | **Minke** | **Blue** | **Fin** | **Gray** | **Humpback** | **ULW** |
| --- | --- | --- | --- | --- | --- | --- | --- |
| **Spring** | # groups | 0 | 0 | 4 | 0 | 26 | 26 |
|  | # individuals | 0 | 0 | 9 | 0 | 47 | 44 |
| **Summer** | # groups | 1 | 9 | 6 | 0 | 7 | 11 |
|  | # individuals | 1 | 14 | 14 | 0 | 17 | 11 |
| **Fall** | # groups | 1 | 2 | 13 | 0 | 29 | 19 |
|  | # individuals | 1 | 2 | 30 | 0 | 101 | 27 |
| **Annual** | Total # groups | 2 | 11 | 23 | 0 | 62 | 56 |
|  | Total # individuals | 2 | 16 | 53 | 0 | 165 | 82 |

Table 10SB. On-effort toothed whale sightings 2022. Species codes are as follows: Dc = Short-beaked common dolphin, Dd = Long-beaked common dolphin, DSP = Unidentified common dolphin, Gg = Risso’s dolphin, Lo = Pacific white-sided dolphin, Pd = Dall’s porpoise, Pm = Sperm whale, Tt = Bottlenose dolphin, UD = Unidentified dolphin, and Zc = Cuvier’s beaked whale.

| **2022** | **Species** | **Dc** | **Dd** | **DSP** | **Gg** | **Lo** | **Pd** | **Pm** | **Tt** | **UD** | **Zc** |
| --- | --- | --- | --- | --- | --- | --- | --- | --- | --- | --- | --- |
| **Spring** | # groups | 2 | 3 | 6 | 0 | 4 | 0 | 0 | 2 | 2 | 2 |
|  | # individuals | 373 | 62 | 836 | 0 | 105 | 0 | 0 | 13 | 57 | 5 |
| **Summer** | # groups | 12 | 6 | 19 | 2 | 0 | 0 | 0 | 1 | 2 | 1 |
|  | # individuals | 1771 | 575 | 1213 | 23 | 0 | 0 | 0 | 6 | 77 | 1 |
| **Fall** | # groups | 2 | 9 | 6 | 0 | 0 | 1 | 1 | 2 | 3 | 0 |
|  | # individuals | 929 | 1601 | 522 | 0 | 0 | 3 | 12 | 10 | 57 | 0 |
| **Annual** | Total # groups | 16 | 18 | 31 | 2 | 2 | 1 | 1 | 5 | 7 | 3 |
|  | Total # individuals | 3073 | 2238 | 2571 | 23 | 105 | 3 | 12 | 29 | 191 | 6 |

Figure S10A. Cetacean scaled sightings for 2004-2022 CalCOFI surveys along core transect lines (93-76). Scaled sighting is defined as summed group sighting best estimates per 1000 km of on-effort, on-transect survey effort per CalCOFI survey. Scaled sightings per survey are displayed for blue whales, fin whales, humpback whales, Risso’s dolphins, Pacific white-sided dolphins, bottlenose dolphins, and common dolphins (short-beaked & long-beaked) as well as Dall’s porpoise. Note the y-axis is a log scale. Scaled sightings are colored by survey season: winter=blue, spring=pink, summer=green, fall=yellow. Asterisks denote CalCOFI surveys in which no visual effort took place; including the winter and spring of 2004, the spring of 2010, the spring, summer, and fall of 2020, the winter and spring of 2021, and the winter of 2022.


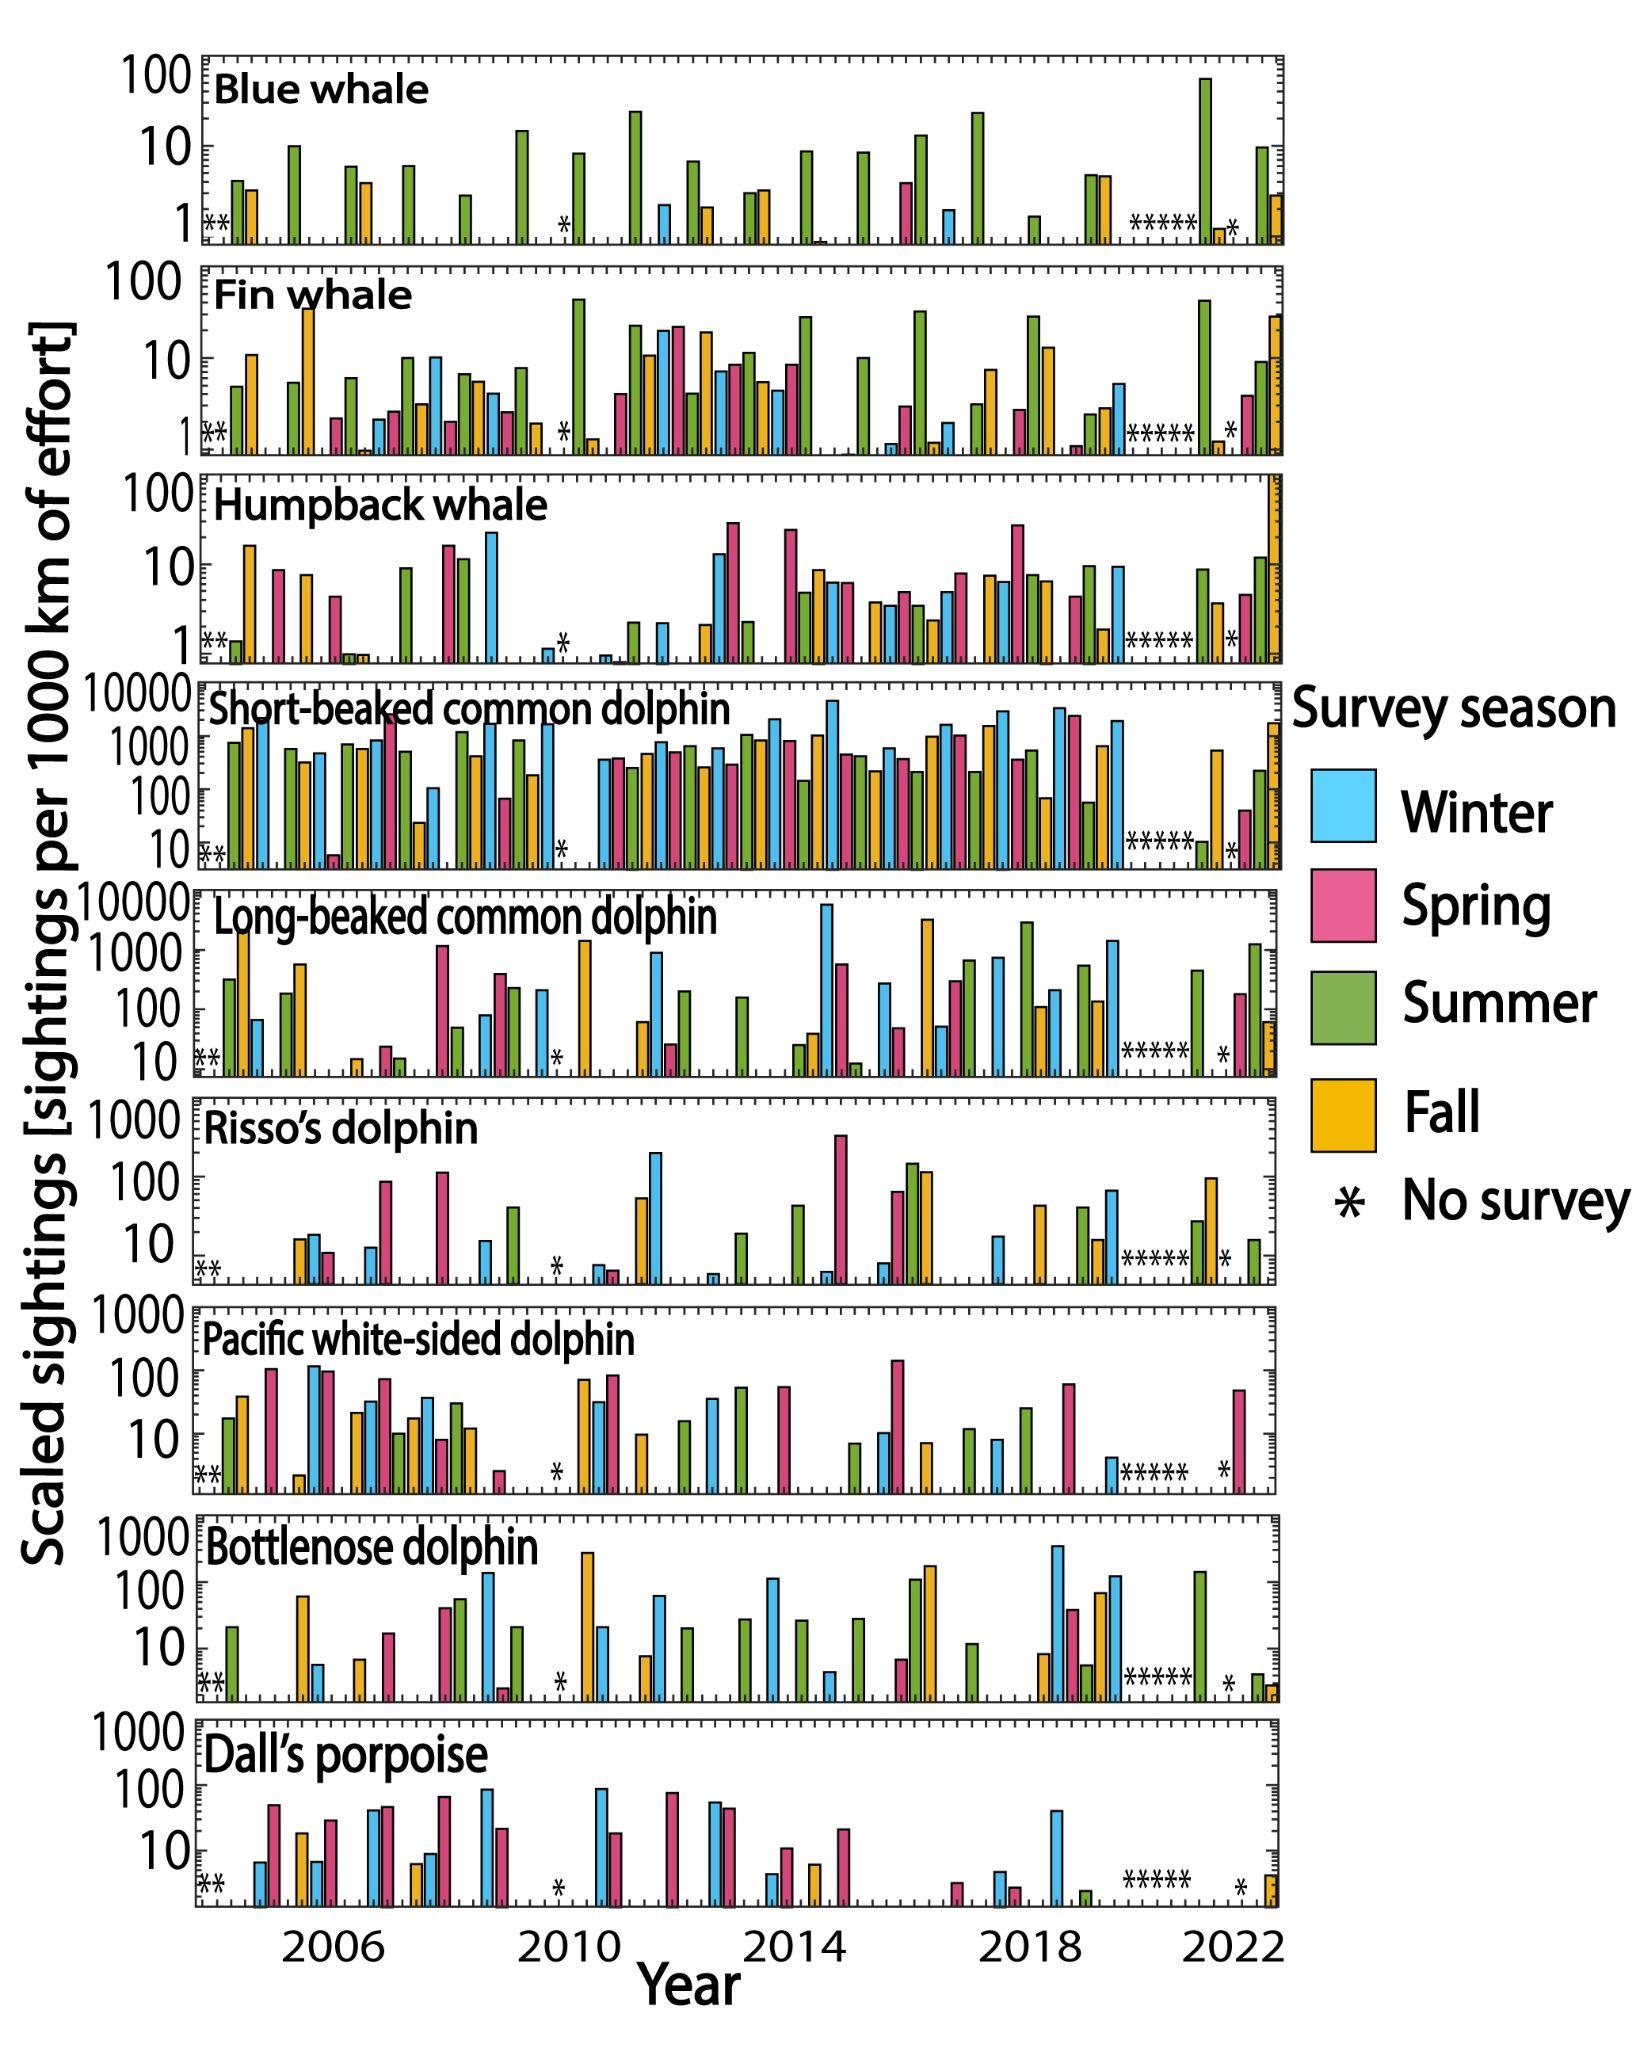


Figure S10B. Baleen whale sightings during CalCOFI spring, summer, and fall cruises 2022. CalCOFI stations are represented by black dots and the ship’s track line is represented as a solid black line between stations.


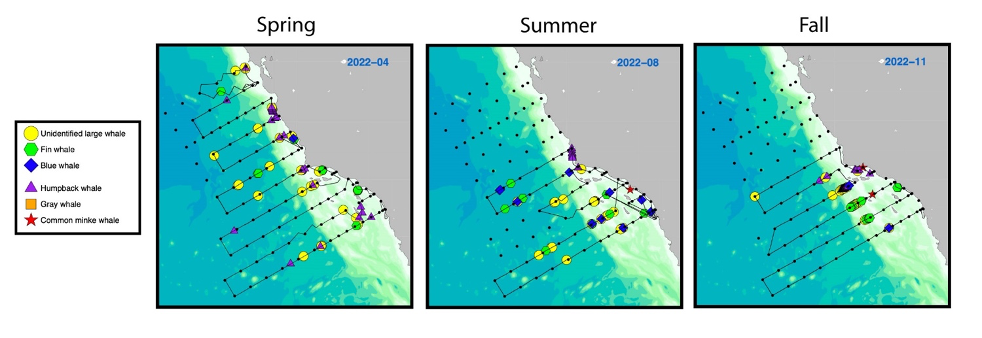


Figure S10C. Toothed whale sightings during CalCOFI spring, summer, and fall cruises 2022. CalCOFI stations are represented by black dots and the ship’s track line is represented as a solid black line between stations.


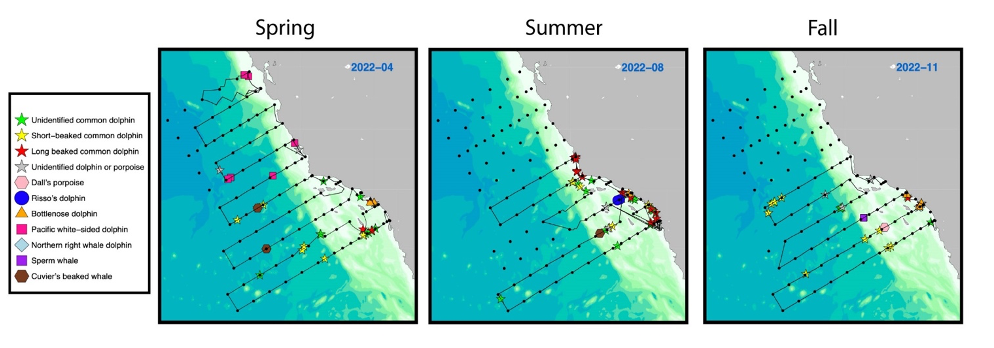

Supplement: Data_Sheet_1.docx [file Data_Sheet_1.docx]
